# Supplementary material for: Development and Validation of the Mexican Public Open Spaces Tool (MexPOS)
Source: MDPI journal article supplement (doi:10.3390/ijerph19138198), 2022-07-05
Supplement: s1 [file s1]

**CUESTIONARIO DE EVALUACIÓN, MEDIANTE OBSERVACIÓN DIRECTA, DE LAS CARACTERÍSTICAS AMBIENTALES DEL PARQUE.**

**Check list:**

ANTES DE LLEGAR AL PARQUE...

¿Leíste el manual?

¿Llenaste la ficha general (sección 1)?

ANTES DE LLENAR EL CUESTIONARIO...

¿Caminaste alrededor del parque antes de llenar éste cuestionario?

ANTES DE DAR POR FINALIZADA LA CAPTURA DEL CUESTIONARIO...

¿Llenaste todas las secciones del cuestionario?

¿Revisaste todas las respuestas?

¿En caso de tener error en alguna respuesta, corregiste de forma correcta?

| Si                       | no                       |
|--------------------------|--------------------------|
| <input type="checkbox"/> | <input type="checkbox"/> |

**¿Qué hacer en caso de error?**

Marque con una "X" la respuesta correcta, en caso de error, rellenar el cuadro y marcar con una "X" la respuesta correcta.

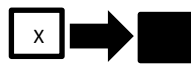

Error

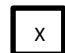

Corrección

Encuestador:

|  |  |  |
|--|--|--|
|  |  |  |
|--|--|--|

Código del parque:

|  |  |  |
|--|--|--|
|  |  |  |
|--|--|--|

1. Fecha de la observación

|   |   |   |   |   |   |   |   |   |   |
|---|---|---|---|---|---|---|---|---|---|
| d | d | / | m | m | / | a | a | a | a |
|---|---|---|---|---|---|---|---|---|---|

2. Temperatura

|  |  |
|--|--|
|  |  |
|--|--|

 °C

(ingresa a: <https://weather.com/esUS/tiempo/hoy//Ciudad+de+Mexico+Mxico+MXDF0132:1:MX>)

3. Clima

- 1 ☐ Soleado
- 2 ☐ Parcialmente soleado
- 3 ☐ Parcialmente nublado
- 4 ☐ Nublado
- 5 ☐ Lluvioso

(ingresa a: <https://weather.com/esUS/tiempo/hoy//Ciudad+de+Mexico+Mxico+MXDF0132:1:MX>)

4. Calidad del aire

|  |  |  |  |       |
|--|--|--|--|-------|
|  |  |  |  | IMECA |
|--|--|--|--|-------|

(ingresa a: <http://aqicn.org/map/world/es/#@q/12.0511/-82.1997/5z>)

5. Hora inicio de captura

|  |  |   |  |  |    |    |
|--|--|---|--|--|----|----|
|  |  | : |  |  | Am | Pm |
|--|--|---|--|--|----|----|

6. Hora de término

|  |  |   |  |  |    |    |
|--|--|---|--|--|----|----|
|  |  | : |  |  | Am | Pm |
|--|--|---|--|--|----|----|

7. Momento del día de captura

|  |       |  |  |         |
|--|-------|--|--|---------|
|  | 1.Día |  |  | 2.Noche |
|--|-------|--|--|---------|

**1. FICHA GENERAL**

Llenar éste apartado ANTES de llegar al parque.

1.1 Nombre del parque: \_\_\_\_\_

1.2 Ubicación: \_\_\_\_\_

1.3 Tipología:

- |   |                          |                      |
|---|--------------------------|----------------------|
| 1 | <input type="checkbox"/> | Parque Metropolitano |
| 2 | <input type="checkbox"/> | Parque Local         |
| 3 | <input type="checkbox"/> | Parque Barrial       |
| 4 | <input type="checkbox"/> | Parque de Bolsillo   |
| 5 | <input type="checkbox"/> | Parque Remanente     |
| 6 | <input type="checkbox"/> | Glorieta             |
| 7 | <input type="checkbox"/> | Jardín               |
| 8 | <input type="checkbox"/> | Plaza                |
| 9 | <input type="checkbox"/> | Alameda              |

## 2. ASPECTOS GENERALES DEL PARQUE

### a. Actividades dentro del parque.

Esta sección recolecta información sobre todas las áreas del parque donde se puede realizar actividad física.

2a.1. ¿Qué áreas de actividad hay en el parque? *Indica todas las que correspondan.*

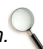

2a.2. Indica TODAS las áreas que son usadas por los usuarios.

|     | Sí                       | No                       |                                         |
|-----|--------------------------|--------------------------|-----------------------------------------|
| 1   | <input type="checkbox"/> | <input type="checkbox"/> | Cancha de volibol                       |
| 2   | <input type="checkbox"/> | <input type="checkbox"/> | Cancha de basquetbol                    |
| 3   | <input type="checkbox"/> | <input type="checkbox"/> | Cancha de frontón                       |
| 4   | <input type="checkbox"/> | <input type="checkbox"/> | Cancha de tenis                         |
| 5   | <input type="checkbox"/> | <input type="checkbox"/> | Campo de fútbol americano               |
| 6   | <input type="checkbox"/> | <input type="checkbox"/> | Campo de fútbol soccer                  |
| 7   | <input type="checkbox"/> | <input type="checkbox"/> | Otros campos, ¿cuál? _____ (2a.1_7a)    |
| 8   | <input type="checkbox"/> | <input type="checkbox"/> | Senderos peatonales                     |
| 9   | <input type="checkbox"/> | <input type="checkbox"/> | Trotapista                              |
| 10  | <input type="checkbox"/> | <input type="checkbox"/> | Ciclopista                              |
| 11  | <input type="checkbox"/> | <input type="checkbox"/> | Parques infantiles                      |
| 12  | <input type="checkbox"/> | <input type="checkbox"/> | Áreas verdes                            |
| 13  | <input type="checkbox"/> | <input type="checkbox"/> | Jardines botánicos                      |
| 14  | <input type="checkbox"/> | <input type="checkbox"/> | Área de comer                           |
| 15  | <input type="checkbox"/> | <input type="checkbox"/> | Área para sentarse                      |
| 16  | <input type="checkbox"/> | <input type="checkbox"/> | Teatro al aire libre                    |
| 17  | <input type="checkbox"/> | <input type="checkbox"/> | Cancha de fútbol rápido                 |
| 18  | <input type="checkbox"/> | <input type="checkbox"/> | Cancha de fútbol 7                      |
| 19  | <input type="checkbox"/> | <input type="checkbox"/> | Cancha combinada de fútbol y básquetbol |
| 20  | <input type="checkbox"/> | <input type="checkbox"/> | Barras                                  |
| 21  | <input type="checkbox"/> | <input type="checkbox"/> | Skatepark                               |
| 22  | <input type="checkbox"/> | <input type="checkbox"/> | Otro, ¿cuál? _____ (2a.1_22.1)          |
| 22a | <input type="checkbox"/> | <input type="checkbox"/> | Otro, ¿cuál? _____ (2a.1_22a.1)         |
| 22b | <input type="checkbox"/> | <input type="checkbox"/> | Otro, ¿cuál? _____ (2a.1_22b.1)         |

|     |                          |                                         |
|-----|--------------------------|-----------------------------------------|
| 1   | <input type="checkbox"/> | Cancha de volibol                       |
| 2   | <input type="checkbox"/> | Cancha de basquetbol                    |
| 3   | <input type="checkbox"/> | Cancha de frontón                       |
| 4   | <input type="checkbox"/> | Cancha de tenis                         |
| 5   | <input type="checkbox"/> | Campo de fútbol americano               |
| 6   | <input type="checkbox"/> | Campo de fútbol soccer                  |
| 7   | <input type="checkbox"/> | Otros campos, ¿cuál? _____ (2a.2_6a)    |
| 8   | <input type="checkbox"/> | Senderos peatonales                     |
| 9   | <input type="checkbox"/> | Trotapista                              |
| 10  | <input type="checkbox"/> | Ciclopista                              |
| 11  | <input type="checkbox"/> | Parques infantiles                      |
| 12  | <input type="checkbox"/> | Áreas verdes                            |
| 13  | <input type="checkbox"/> | Jardines botánicos                      |
| 14  | <input type="checkbox"/> | Área de comer                           |
| 15  | <input type="checkbox"/> | Área para sentarse                      |
| 16  | <input type="checkbox"/> | Teatro al aire libre                    |
| 17  | <input type="checkbox"/> | Cancha de fútbol rápido                 |
| 18  | <input type="checkbox"/> | Cancha de fútbol 7                      |
| 19  | <input type="checkbox"/> | Cancha combinada de fútbol y básquetbol |
| 20  | <input type="checkbox"/> | Barras                                  |
| 21  | <input type="checkbox"/> | Skatepark                               |
| 22  | <input type="checkbox"/> | Otro, ¿cuál? _____ (2a.2_22.2)          |
| 22a | <input type="checkbox"/> | Otro, ¿cuál? _____ (2a.2_22a.2)         |
| 22b | <input type="checkbox"/> | Otro, ¿cuál? _____ (2a.2_22b.2)         |

2a.3. ¿Qué áreas se encuentran en BUENA condición? *Califica TODAS las áreas.*

| Áreas |                                         | 1.Totalmente de acuerdo<br> | 2. De acuerdo<br> | 3.Ni de acuerdo ni en desacuerdo<br> | 4.En desacuerdo<br> | 5.Totalmente en desacuerdo<br> | 6. No aplica |
|-------|-----------------------------------------|--------------------------------------------------------------------------------------------------------------|-----------------------------------------------------------------------------------------------------|-------------------------------------------------------------------------------------------------------------------------|--------------------------------------------------------------------------------------------------------|-------------------------------------------------------------------------------------------------------------------|--------------|
| 1     | Cancha de volibol                       |                                                                                                              |                                                                                                     |                                                                                                                         |                                                                                                        |                                                                                                                   |              |
| 2     | Cancha de basquetbol                    |                                                                                                              |                                                                                                     |                                                                                                                         |                                                                                                        |                                                                                                                   |              |
| 3     | Cancha de frontón                       |                                                                                                              |                                                                                                     |                                                                                                                         |                                                                                                        |                                                                                                                   |              |
| 4     | Cancha de tenis                         |                                                                                                              |                                                                                                     |                                                                                                                         |                                                                                                        |                                                                                                                   |              |
| 5     | Campo de fútbol americano               |                                                                                                              |                                                                                                     |                                                                                                                         |                                                                                                        |                                                                                                                   |              |
| 6     | Campo de fútbol soccer                  |                                                                                                              |                                                                                                     |                                                                                                                         |                                                                                                        |                                                                                                                   |              |
| 7     | Otros campos, ¿cuál? (2a.3_7)           |                                                                                                              |                                                                                                     |                                                                                                                         |                                                                                                        |                                                                                                                   |              |
| 8     | Senderos peatonales                     |                                                                                                              |                                                                                                     |                                                                                                                         |                                                                                                        |                                                                                                                   |              |
| 9     | Trotapista                              |                                                                                                              |                                                                                                     |                                                                                                                         |                                                                                                        |                                                                                                                   |              |
| 10    | Ciclopista                              |                                                                                                              |                                                                                                     |                                                                                                                         |                                                                                                        |                                                                                                                   |              |
| 11    | Parques infantiles                      |                                                                                                              |                                                                                                     |                                                                                                                         |                                                                                                        |                                                                                                                   |              |
| 12    | Áreas verdes                            |                                                                                                              |                                                                                                     |                                                                                                                         |                                                                                                        |                                                                                                                   |              |
| 13    | Jardines botánicos                      |                                                                                                              |                                                                                                     |                                                                                                                         |                                                                                                        |                                                                                                                   |              |
| 14    | Área de comer                           |                                                                                                              |                                                                                                     |                                                                                                                         |                                                                                                        |                                                                                                                   |              |
| 15    | Área para sentarse                      |                                                                                                              |                                                                                                     |                                                                                                                         |                                                                                                        |                                                                                                                   |              |
| 16    | Teatro al aire libre                    |                                                                                                              |                                                                                                     |                                                                                                                         |                                                                                                        |                                                                                                                   |              |
| 17    | Cancha de fútbol rápido                 |                                                                                                              |                                                                                                     |                                                                                                                         |                                                                                                        |                                                                                                                   |              |
| 18    | Cacha de futbol 7                       |                                                                                                              |                                                                                                     |                                                                                                                         |                                                                                                        |                                                                                                                   |              |
| 19    | Cancha combinada de fútbol y básquetbol |                                                                                                              |                                                                                                     |                                                                                                                         |                                                                                                        |                                                                                                                   |              |
| 20    | Barrar                                  |                                                                                                              |                                                                                                     |                                                                                                                         |                                                                                                        |                                                                                                                   |              |
| 21    | Skatepark                               |                                                                                                              |                                                                                                     |                                                                                                                         |                                                                                                        |                                                                                                                   |              |
| 22    | Otro, ¿cuál? (2a.3_22)                  |                                                                                                              |                                                                                                     |                                                                                                                         |                                                                                                        |                                                                                                                   |              |
| 22a   | Otro, ¿cuál? (2a.3_22a)                 |                                                                                                              |                                                                                                     |                                                                                                                         |                                                                                                        |                                                                                                                   |              |
| 22b   | Otro, ¿cuál? (2a.3_22b)                 |                                                                                                              |                                                                                                     |                                                                                                                         |                                                                                                        |                                                                                                                   |              |

2a.4. ¿Se realizan actividades diferentes para lo que están destinadas las áreas?

- <sup>1</sup> ☐ Sí  
<sup>2</sup> ☐ No

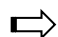

Pasa a sección "información y comunicación)

2a.5. ¿Qué actividades observas que realizan en estos espacios? *Si los espacios no son utilizados para las actividades destinadas anotar.*

- |    |                                     |       |          |
|----|-------------------------------------|-------|----------|
| 1. | Canchas (fútbol rápido, basquetbol) | _____ | (2a.5.1) |
| 2. | Campos                              | _____ | (2a.5.2) |
| 3. | Áreas verdes                        | _____ | (2a.5.3) |

**b. Información y comunicación.**

Esta sección pretende describir si el parque cuenta con mapas, normas de comportamiento y equipos rentables.

2b.1. ¿Existe señalización o punto de referencia que indique el nombre del parque?

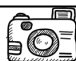

- 1 ☐ Sí, ¿cuál? (ejemplo: cartel formal, cartel informal) \_\_\_\_\_ (2b.1.1.a)
- 2 ☐ No

2b.2. ¿Existe un mapa general del parque?

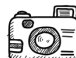

- 1 ☐ Sí
- 2 ☐ No

2b.3. ¿Existe algún cartel o señal que indique las normas de comportamiento en el parque (por ejemplo: NO escupir, fumar, mascotas, restricción a ciertas zonas, etc.)?

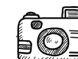

- 1 ☐ Sí, ¿cuál? \_\_\_\_\_ (2b.3.a)
- 2 ☐ No

2b.4. ¿Existe algún cartel o señal que indique quiénes son los encargados del parque?

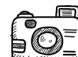

- 1 ☐ Sí
- 2 ☐ No

2b.5. ¿Existe algún cartel o señal que indique si el parque cuenta con equipos rentables (por ejemplo: lanchas, bicicletas, carritos, etc.)?

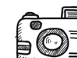

- 1 ☐ Sí, especifique cuál (es) \_\_\_\_\_ (2b.5.a)
- 2 ☐ No

2b.6. ¿Existe algún cartel o señal informando sobre algún evento en el parque?

- 1 ☐ Sí, ¿qué tipo de eventos? \_\_\_\_\_ (2b.6.1)
- 2 ☐ No

## 2c. Estética

Esta sección pretende conocer la estética y ambiente del parque, por ejemplo: si es atractivo visualmente, sonidos y olores.

2c.1. De acuerdo a lo observado hoy, ¿El parque es atractivo?

|   |                          |                                |                                                                                   |
|---|--------------------------|--------------------------------|-----------------------------------------------------------------------------------|
| 1 | <input type="checkbox"/> | Totalmente de acuerdo          |  |
| 2 | <input type="checkbox"/> | De acuerdo                     |  |
| 3 | <input type="checkbox"/> | Ni de acuerdo ni en desacuerdo |  |
| 4 | <input type="checkbox"/> | En desacuerdo                  |  |
| 5 | <input type="checkbox"/> | Totalmente en desacuerdo       |  |

2c.2. ¿La condición del paisaje es adecuada?

|   |                          |                                |                                                                                     |
|---|--------------------------|--------------------------------|-------------------------------------------------------------------------------------|
| 1 | <input type="checkbox"/> | Totalmente de acuerdo          |  |
| 2 | <input type="checkbox"/> | De acuerdo                     |  |
| 3 | <input type="checkbox"/> | Ni de acuerdo ni en desacuerdo |  |
| 4 | <input type="checkbox"/> | En desacuerdo                  |  |
| 5 | <input type="checkbox"/> | Totalmente en desacuerdo       |  |

2c.3. ¿Hay grafiti?

|   |                          |    |
|---|--------------------------|----|
| 1 | <input type="checkbox"/> | Sí |
| 2 | <input type="checkbox"/> | No |

➡ Pasa a 2c.5

2c.4. ¿Cuánto grafiti es visible?

|   |                          |       |                                                                                     |
|---|--------------------------|-------|-------------------------------------------------------------------------------------|
| 1 | <input type="checkbox"/> | Mucho |    |
| 2 | <input type="checkbox"/> | Algo  |   |
| 3 | <input type="checkbox"/> | Poco  |  |
| 4 | <input type="checkbox"/> | Nada  |  |

2c.5. ¿Observas exceso de basura en el parque?

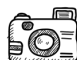

|   |                          |                   |          |
|---|--------------------------|-------------------|----------|
| 1 | <input type="checkbox"/> | Sí, ¿dónde? _____ | (2c.5.a) |
| 2 | <input type="checkbox"/> | No                |          |

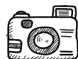

2c.6. ¿Observas basura de excremento de animales en el parque?

- 1 ☐ Sí, ¿dónde? \_\_\_\_\_ (2c.6.1)  
 2 ☐ No  
 3 ☐ No aplica

2c.7. ¿Existe alguna fuente de sombra?

- 1 ☐ Sí  
 2 ☐ No ➡ Pasa a 2c.9

2c.7b. ¿Cuáles son las fuentes de sombra y en qué cantidad se encuentran? *Indica todas las que correspondan*

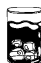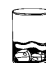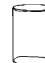

- 1 ☐ Árboles, ¿cuánto? (2c.7b\_1a)  
 2 ☐ Edificios, ¿cuánto? (2c.7b\_2a)  
 3 ☐ Refugios, ¿cuánto? (2c.7b\_3a)  
 4 ☐ Carpas, ¿cuánto? (2c.7b\_4a)  
 5 ☐ Otro, ¿cuál?, \_\_\_\_\_ (2c.7\_5a)

| 1.    | 2.   | 3.   |
|-------|------|------|
| Mucho | Poco | Nada |

Refugio se refiere a elementos arquitectónicos como son pérgolas, techumbres y quioscos que sirven para asilarse del sol y/o la lluvia.

2c.8. En total, ¿cuánto del parque podría estar sombreado? *\*Nota: llenar al final del recorrido.*

- 0 ☐ 0  
 1 ☐ 1-25%  
 2 ☐ 26-75%  
 3 ☐ 76-100%

2c.9. ¿Qué sonidos escuchas? *Indica todas las que correspondan.*

- 1 ☐ Agua, ¿dónde? \_\_\_\_\_ (2c.9\_1a)  
 2 ☐ Pájaro  
 3 ☐ Tráfico, ¿dónde? \_\_\_\_\_ (2c.9\_3a)

- 4 ☐ Construcción, ¿dónde? \_\_\_\_\_ (2c.9\_4a)  
 5 ☐ Voces, ¿dónde? \_\_\_\_\_ (2c.9\_5a)  
 6 ☐ Música, ¿dónde? \_\_\_\_\_ (2c.9\_6a)  
 7 ☐ Otro, ¿cuál? \_\_\_\_\_ (2c.9\_7a)

2c.10. De acuerdo al día de hoy, ¿el olor en general del parque es agradable?

- |   |                          |                                |                                                                                   |
|---|--------------------------|--------------------------------|-----------------------------------------------------------------------------------|
| 1 | <input type="checkbox"/> | Totalmente de acuerdo          |  |
| 2 | <input type="checkbox"/> | De acuerdo                     |  |
| 3 | <input type="checkbox"/> | Ni de acuerdo ni en desacuerdo |  |
| 4 | <input type="checkbox"/> | En desacuerdo                  |  |
| 5 | <input type="checkbox"/> | Totalmente en desacuerdo       |  |

2c.11. ¿En general, el parque cuenta con BUEN mantenimiento?

- 1 ☐ Sí  
 2 ☐ No

2c.12. ¿El parque cuenta con características históricas, educativas o artísticas? Por ejemplo: monumentos, visualización de la naturaleza, estatuas, esculturas, fuentes, etc.)

- 1 ☐ Sí, especificar \_\_\_\_\_ (2c.12.a)  
 2 ☐ No

2c.13. ¿En general, cuánto porcentaje del parque es área enselvada? Por ejemplo: bosques o árboles densos.

- 0 ☐ 0  
 1 ☐ 1-25%  
 2 ☐ 26-75%  
 3 ☐ 76-100%

2c.14. ¿El parque cuenta con elementos de agua como: lagos, arroyos o estanques?

- 1 ☐ Sí, ¿dónde? \_\_\_\_\_ (2c.14a)  
 2 ☐ No



### 3. ACCESIBILIDAD

Esta sección pretende identificar si el parque está abierto a la población en general, si tiene conexión con medios de transporte, así como estacionamientos.

3.1. ¿La apertura del parque u operación del parque depende de un conserje/administrador?

- 1 ☐ Sí  
2 ☐ No

3.2. ¿El parque está bardeado o enrejado?

- 1 ☐ Sí, porcentaje \_\_\_\_\_ (3.2a)  
2 ☐ No

3.3. ¿Existe algún anuncio especificando las horas de operación del parque?

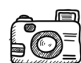

- 1 ☐ Sí  
2 ☐ No

3.4. ¿Cuántas entradas tiene el parque para los usuarios?

- 1 ☐ Solo 1  
2 ☐ 2-5  
3 ☐ Más de 5  
4 ☐ Es parque abierto

3.5. ¿Todas las áreas del parque se encuentran abiertas para el público en general?

- 1 ☐ Sí  
2 ☐ No

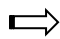

Pasa a 3.9

3.6. ¿Enlista las áreas que NO son de acceso al público en general?

---

---

---

---

3.7. ¿Se requiere una membresía o cuota para acceder a estas áreas?

|   |                          |    |
|---|--------------------------|----|
| 1 | <input type="checkbox"/> | Sí |
| 2 | <input type="checkbox"/> | No |

Pasa a 3.9

3.8. ¿Cuál es el costo aproximado de ésta membresía/cuota?

\$ 

|  |  |  |  |
|--|--|--|--|
|  |  |  |  |
|--|--|--|--|

3.9. ¿El parque cuenta con elementos que garanticen la accesibilidad universal? Por ejemplo: rampas, barandales, mapas hápticos, etc.

Elementos

- 1 Rampas
- 2 Barandales
- 3 Mapas hápticos
- 4 Señalización en braille
- 5 Otro, ¿cuál? \_\_\_\_\_ (3.9\_5a)

|   | Si                       |   | No                       |
|---|--------------------------|---|--------------------------|
| 1 | <input type="checkbox"/> | 2 | <input type="checkbox"/> |
| 1 | <input type="checkbox"/> | 2 | <input type="checkbox"/> |
| 1 | <input type="checkbox"/> | 2 | <input type="checkbox"/> |
| 1 | <input type="checkbox"/> | 2 | <input type="checkbox"/> |
| 1 | <input type="checkbox"/> | 2 | <input type="checkbox"/> |

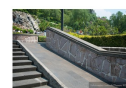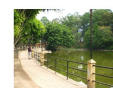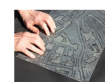

3.10. En un radio de 100 m. ¿cuántas estaciones de transporte público existen? (estaciones de metro, paradas de autobús, etc.).

Estaciones de transporte

Número

|   |                     |                      |                      |
|---|---------------------|----------------------|----------------------|
| 1 | Estaciones de metro | <input type="text"/> | <input type="text"/> |
| 2 | Paradas de autobús  | <input type="text"/> | <input type="text"/> |
| 3 | Estación de taxi    | <input type="text"/> | <input type="text"/> |
| 4 | Metrobus            | <input type="text"/> | <input type="text"/> |
| 5 | EcoBici             | <input type="text"/> | <input type="text"/> |
| 6 | _____               | <input type="text"/> | <input type="text"/> |
| 7 | _____               | <input type="text"/> | <input type="text"/> |

3.11. ¿Existen paradas de transporte público a la vista desde el parque?

|   |                          |    |
|---|--------------------------|----|
| 1 | <input type="checkbox"/> | Sí |
| 2 | <input type="checkbox"/> | No |

3.12. ¿El parque cuenta con estacionamiento para autos?

|   |                          |    |
|---|--------------------------|----|
| 1 | <input type="checkbox"/> | Sí |
| 2 | <input type="checkbox"/> | No |

Pasa a 3.15

3.13. ¿Tiene algún costo el estacionamiento de autos? ¿cuál es el costo?

|   |                          |           |    |                      |                      |                      |                      |         |
|---|--------------------------|-----------|----|----------------------|----------------------|----------------------|----------------------|---------|
| 1 | <input type="checkbox"/> | Si, costo | \$ | <input type="text"/> | <input type="text"/> | <input type="text"/> | <input type="text"/> | (3.13a) |
| 2 | <input type="checkbox"/> | No        |    |                      |                      |                      |                      |         |

3.14. ¿Cuántos espacios hay para estacionar autos?

|   |                          |             |
|---|--------------------------|-------------|
| 1 | <input type="checkbox"/> | Menos de 10 |
| 2 | <input type="checkbox"/> | 10-20       |
| 3 | <input type="checkbox"/> | Más de 20   |

3.15. ¿El parque cuenta con estacionamiento para motocicletas?

|   |                          |    |                                                                                                |
|---|--------------------------|----|------------------------------------------------------------------------------------------------|
| 1 | <input type="checkbox"/> | Sí | ➡ <div style="border: 1px solid black; padding: 2px; display: inline-block;">Pasa a 3.18</div> |
| 2 | <input type="checkbox"/> | No |                                                                                                |

3.16. ¿Tiene algún costo el estacionamiento de las motocicletas? ¿cuál es el costo?

|   |                          |           |    |                      |                      |                      |                      |         |
|---|--------------------------|-----------|----|----------------------|----------------------|----------------------|----------------------|---------|
| 1 | <input type="checkbox"/> | Si, costo | \$ | <input type="text"/> | <input type="text"/> | <input type="text"/> | <input type="text"/> | (3.16a) |
| 2 | <input type="checkbox"/> | No        |    |                      |                      |                      |                      |         |

3.17. ¿Cuántos espacios hay para estacionar motos?

|   |                          |             |
|---|--------------------------|-------------|
| 1 | <input type="checkbox"/> | Menos de 10 |
| 2 | <input type="checkbox"/> | 10 a 20     |
| 3 | <input type="checkbox"/> | Más de 20   |

3.18. ¿El parque cuenta con estacionamiento para bicicletas?

|   |                          |    |                                                                                                |
|---|--------------------------|----|------------------------------------------------------------------------------------------------|
| 1 | <input type="checkbox"/> | Sí | ➡ <div style="border: 1px solid black; padding: 2px; display: inline-block;">Pasa a 3.22</div> |
| 2 | <input type="checkbox"/> | No |                                                                                                |

3.19. ¿Tiene algún costo el estacionamiento de las bicicletas? ¿Cuál es el costo?

|   |                          |           |    |                      |                      |                      |                      |         |
|---|--------------------------|-----------|----|----------------------|----------------------|----------------------|----------------------|---------|
| 1 | <input type="checkbox"/> | Si, costo | \$ | <input type="text"/> | <input type="text"/> | <input type="text"/> | <input type="text"/> | (3.19a) |
| 2 | <input type="checkbox"/> | No        |    |                      |                      |                      |                      |         |

3.20. ¿Cuántos espacios hay para estacionar bicicletas?

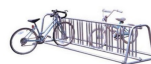

- 1 ☐ Menos de 10
- 2 ☐ 10 a 20
- 3 ☐ Más de 20

3.21. ¿Cuántos estantes de estacionamiento para bicicletas son funcionales?

- 1 ☐ Todos 
- 2 ☐ Algunos 
- 3 ☐ Pocos 
- 4 ☐ Ninguno 

3.22. ¿Hay señalización restrictiva para estacionar la bicicleta dentro del parque?

- 1 ☐ Sí
- 2 ☐ No

3.23. ¿Hay una ruta para bicicletas que colinde con el parque?

- 1 ☐ Sí
- 2 ☐ No

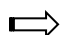

*Pasa a sección 4 "Contexto inmediato"*

3.24. ¿La ruta para bicicletas está claramente señalizada (señalización horizontal o vertical)?

- 1 ☐ Sí, ¿cuál? \_\_\_\_\_ (3.24a)
- 2 ☐ No

#### 4. CONTEXTO INMEDIATO.

Esta sección pretende identificar el ambiente alrededor del parque. Las características de las calles, así como elementos de seguridad en las

4.1. ¿Cuáles son los principales usos de suelo alrededor del parque? *Indica todas las que correspondan.*

|   | Sí |                          | No |                          |                                                             |
|---|----|--------------------------|----|--------------------------|-------------------------------------------------------------|
| 1 | 1  | <input type="checkbox"/> | 2  | <input type="checkbox"/> | Residencial/habitacional                                    |
| 2 | 1  | <input type="checkbox"/> | 2  | <input type="checkbox"/> | Comercial                                                   |
| 3 | 1  | <input type="checkbox"/> | 2  | <input type="checkbox"/> | Institucional (por ejemplo escuelas) → equipamiento urbano. |
| 4 | 1  | <input type="checkbox"/> | 2  | <input type="checkbox"/> | Industrial                                                  |
| 5 | 1  | <input type="checkbox"/> | 2  | <input type="checkbox"/> | Natural                                                     |
| 6 | 1  | <input type="checkbox"/> | 2  | <input type="checkbox"/> | Otro, especificar _____ (4.1.6a)                            |

4.2. ¿Cuál de los siguientes problemas de seguridad y/o apariencia están presentes en la zona que rodea el parque? *Indica todas las que correspondan.*

|    | Sí |                          | No |                          |                                                                                                   |
|----|----|--------------------------|----|--------------------------|---------------------------------------------------------------------------------------------------|
| 1  | 1  | <input type="checkbox"/> | 2  | <input type="checkbox"/> | Poca iluminación en las calles de la zona.                                                        |
| 2  | 1  | <input type="checkbox"/> | 2  | <input type="checkbox"/> | Grafiti (por ejemplo: pinturas que reducen la calidad visual del área)                            |
| 3  | 1  | <input type="checkbox"/> | 2  | <input type="checkbox"/> | Vandalismo (por ejemplo: señales de daños).                                                       |
| 4  | 1  | <input type="checkbox"/> | 2  | <input type="checkbox"/> | Basura.                                                                                           |
| 5  | 1  | <input type="checkbox"/> | 2  | <input type="checkbox"/> | Tráfico pesado.                                                                                   |
| 6  | 1  | <input type="checkbox"/> | 2  | <input type="checkbox"/> | Ruido excesivo.                                                                                   |
| 7  | 1  | <input type="checkbox"/> | 2  | <input type="checkbox"/> | Construcciones vacías o desagradables (por ejemplo: casas abandonadas).                           |
| 8  | 1  | <input type="checkbox"/> | 2  | <input type="checkbox"/> | Propiedades con poco mantenimiento.                                                               |
| 9  | 1  | <input type="checkbox"/> | 2  | <input type="checkbox"/> | Falta de personas en las calles.                                                                  |
| 10 | 1  | <input type="checkbox"/> | 2  | <input type="checkbox"/> | Evidencia de comportamientos o personas amenazantes (por ejemplo: bandas, alcohol, uso de droga). |
| 11 | 1  | <input type="checkbox"/> | 2  | <input type="checkbox"/> | Otro, especificar _____ (4.2.11)                                                                  |

4.3. ¿Cómo se articulan las calles con el parque? *Indica todas las que correspondan.*

|   | Sí |                          | No |                          |                                             |
|---|----|--------------------------|----|--------------------------|---------------------------------------------|
| 1 | 1  | <input type="checkbox"/> | 2  | <input type="checkbox"/> | El parque se encuentra rodeado por calles   |
| 2 | 1  | <input type="checkbox"/> | 2  | <input type="checkbox"/> | El parque se encuentra atravesando la calle |
| 3 | 1  | <input type="checkbox"/> | 2  | <input type="checkbox"/> | El parque contiene dentro, una calle        |

4.4. Enlista las calles alrededor del parque. Para cada calle, rellena los siguientes incisos (2-9) usando la escala que aparece hasta abajo del cuadro.

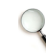

| 1. Calle número (enlista las calles) | 2. Nombre de la calle | 3. Tipo de calle                             | 4. Señales de tráfico existentes en la calle |                     |                 |                            |              | 5. ¿Los cruces son seguros en esa calle? | 6. ¿Hay áreas de resguardo para el peatón? | 7. ¿Cuál es el límite de velocidad? | 8. ¿Hay banquetas? | 9. Condición de banquetas         |
|--------------------------------------|-----------------------|----------------------------------------------|----------------------------------------------|---------------------|-----------------|----------------------------|--------------|------------------------------------------|--------------------------------------------|-------------------------------------|--------------------|-----------------------------------|
|                                      |                       |                                              | Señalero peatonal                            | Señalero para autos | Cruces de cebra | Letrero de no estacionarse | Otro, ¿cuál? |                                          |                                            |                                     |                    |                                   |
|                                      |                       |                                              |                                              |                     |                 |                            |              |                                          |                                            |                                     |                    |                                   |
|                                      |                       |                                              |                                              |                     |                 |                            |              |                                          |                                            |                                     |                    |                                   |
|                                      |                       |                                              |                                              |                     |                 |                            |              |                                          |                                            |                                     |                    |                                   |
|                                      |                       |                                              |                                              |                     |                 |                            |              |                                          |                                            |                                     |                    |                                   |
|                                      |                       |                                              |                                              |                     |                 |                            |              |                                          |                                            |                                     |                    |                                   |
|                                      |                       |                                              |                                              |                     |                 |                            |              |                                          |                                            |                                     |                    |                                   |
| Números (1 al 100)                   | Letras (rellena)      | 1. Primaria<br>2. Secundaria<br>3. Terciaria | 1. Si<br>2. No                               |                     |                 |                            |              | 1. Si<br>2. No                           | 1. Si<br>2. No                             | Km/h<br>2. No cuenta con letrero    | 1. Si<br>2. No     | 1. Buena<br>2. Regular<br>3. Mala |

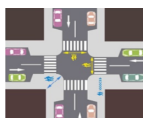

Cruce peatonal con una ampliación de acera tipo "oreja"

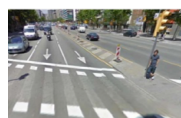

Isla peatonal

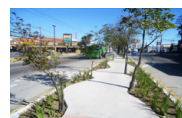

Camellón peatonal

## 5. CAMINOS/RUTAS INTERNAS/PISTA DENTRO DEL PARQUE

Esta sección pretende identificar la condición del camino/ruta/pista de mayor jerarquía dentro del parque, así como sus características.

5.1. ¿Existe algún camino/ruta/pista dentro del parque?

- 1 ☐ Sí  
 2 ☐ No

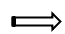

Pasa a sección 6 "Seguridad e iluminación"

5.2. Medir el ancho del camino/ruta/pista (en caso de que sean varias, seleccionar la de mayor jerarquía\*)

- 1 ☐ <0.6 metros
- 2 ☐ 0.6-1.5 metros
- 3 ☐ Más de 1.5 metros
- 4 ☐ No se puede evaluar

5.3. ¿De qué material está hecha la superficie del camino/ruta/pista?

- 1 ☐ Arcilla
- 2 ☐ Asfalto
- 3 ☐ Concreto
- 4 ☐ Tierra
- 5 ☐ Aserrín
- 6 ☐ Otro, ¿Cuál? \_\_\_\_\_ (5.3a)

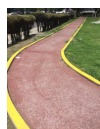

Arcilla

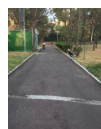

Asfalto

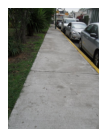

Concreto

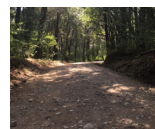

Tierra

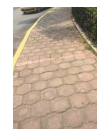

Adoquín

5.4. ¿El camino/ruta/pista de mayor jerarquía está obstruido?

- 1 ☐ Sí
- 2 ☐ No

5.5. ¿La condición del camino/ruta/pista de mayor jerarquía es buena?

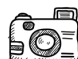

- 1 ☐ Totalmente de acuerdo
- 2 ☐ De acuerdo
- 3 ☐ Ni de acuerdo ni en desacuerdo
- 4 ☐ En desacuerdo
- 5 ☐ Totalmente en desacuerdo

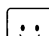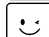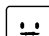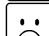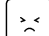

5.6. ¿Hay anuncios en el camino/ruta/pista de mayor jerarquía?

- 1 ☐ Sí
- 2 ☐ No

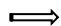

Pasa a sección 6 "Seguridad e iluminación"

5.7. ¿En general, los anuncios del camino/ruta/pista son visibles?

- 1 ☐ Sí  
2 ☐ No

5.8. ¿En general, la condición de la mayoría de los anuncios es buena?

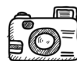

- |   |                          |                                |                          |
|---|--------------------------|--------------------------------|--------------------------|
| 1 | <input type="checkbox"/> | Totalmente de acuerdo          | <input type="checkbox"/> |
| 2 | <input type="checkbox"/> | De acuerdo                     | <input type="checkbox"/> |
| 3 | <input type="checkbox"/> | Ni de acuerdo ni en desacuerdo | <input type="checkbox"/> |
| 4 | <input type="checkbox"/> | En desacuerdo                  | <input type="checkbox"/> |
| 5 | <input type="checkbox"/> | Totalmente en desacuerdo       | <input type="checkbox"/> |

5.9. ¿El contenido de los anuncios es para indicar usos (por ejemplo: anuncios dentro de la pista que indican el sentido de los carriles para personas que caminan o corren, etc.)?

- 1 ☐ Sí  
2 ☐ No

5.10. ¿El contenido de los anuncios es de comida/bebidas?

- 1 ☐ Sí  
2 ☐ No

5.11. ¿El contenido de los anuncios es de avisos (por ejemplo: carreras próximamente, cierre de pista por mantenimiento)?

- 1 ☐ Sí  
2 ☐ No

5.12. ¿El contenido de los anuncios es para distancias?

- 1 ☐ Sí  
2 ☐ No



## 6. SEGURIDAD E ILUMINACIÓN

En esta sección se pretende conocer si el parque cuenta con la presencia de policías, así como diferentes elementos de seguridad.

6.1. ¿La seguridad dentro del parque es pública o privada?

- 1 ☐ Pública  
 2 ☐ Privada  
 3 ☐ Pública/privada  
 4 ☐ Ninguna

6.2. ¿Hay estaciones de policía dentro del parque?

- 1 ☐ Sí  
 2 ☐ No

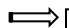

Pasa a 6.4

6.3. ¿Cuántas estaciones de policías hay?

|  |  |  |
|--|--|--|
|  |  |  |
|--|--|--|

6.4. ¿Existe presencia policial en el parque?

- 1 ☐ Sí, en todo momento  
 2 ☐ Solo en la noche  
 3 ☐ Ocasionalmente  
 4 ☐ No

6.5. Indique los elementos de seguridad presentes en el parque (si no hay elementos de seguridad pasa a la pregunta 6.7):

- |   |   | Sí                       |   | No                       |                              |
|---|---|--------------------------|---|--------------------------|------------------------------|
| 1 | 1 | <input type="checkbox"/> | 2 | <input type="checkbox"/> | Cámaras de seguridad         |
| 2 | 1 | <input type="checkbox"/> | 2 | <input type="checkbox"/> | Botones de pánico            |
| 3 | 1 | <input type="checkbox"/> | 2 | <input type="checkbox"/> | Garitas de seguridad         |
| 4 | 1 | <input type="checkbox"/> | 2 | <input type="checkbox"/> | Otros, ¿cuál? _____ (6.5_4a) |

6.6. ¿Existen carteles que indiquen la presencia de éstos elementos de seguridad? (Al menos uno de los anteriores)

- 1 ☐ Sí, ¿cuál? \_\_\_\_\_ (6.6.a)  
 2 ☐ No

6.7. ¿Han habido incidentes de seguridad en lo que va del año? *(reportado en algún medio masivo de comunicación ó por parte de los administradores y/o grupos del parque)*

- 1 ☐ Sí  
 2 ☐ No

#### 6a. Iluminación

Esta sección pretende identificar la iluminación del parque, así como el tipo, calidad y áreas iluminadas.

6a.1. ¿El parque cuenta con iluminación?

- 1 ☐ Todo el parque tiene iluminación  
 2 ☐ Solo algunos sectores tienen iluminación  
 3 ☐ No  Pasa a sección 7 "Equipamientos y servicios internos"  
 4 ☐ Otro, especificar \_\_\_\_\_ (6a.1\_4a)

6a.2. ¿Qué tipo de iluminación hay dentro del parque? *señale las que aplican.*

- |   | Sí                       | No                       |                               |
|---|--------------------------|--------------------------|-------------------------------|
| 1 | <input type="checkbox"/> | <input type="checkbox"/> | Panel Solar                   |
| 2 | <input type="checkbox"/> | <input type="checkbox"/> | Luz eléctrica                 |
| 3 | <input type="checkbox"/> | <input type="checkbox"/> | Planta de luz                 |
| 4 | <input type="checkbox"/> | <input type="checkbox"/> | Otra, ¿Cuál? _____ (6a.2.4.1) |

6a.3. Clasifica la iluminación del parque en general *(contestar solo si evalúas el parque durante la noche).*

- |      |                          |                |                                                                                     |
|------|--------------------------|----------------|-------------------------------------------------------------------------------------|
| 1    | <input type="checkbox"/> | Muy iluminado  |  |
| 2    | <input type="checkbox"/> | Algo iluminado |                                                                                     |
| 3    | <input type="checkbox"/> | Poco iluminado |                                                                                     |
| 9999 | <input type="checkbox"/> | No aplica      |                                                                                     |

6a.4. ¿El área de estacionamientos (tanto de autos, motos y bicicletas) tiene iluminación?

- 1 ☐ Todo el área del estacionamiento tiene iluminación  
2 ☐ Algunas secciones del estacionamiento tienen iluminación  
3 ☐ No tiene iluminación  
4 ☐ No cuenta con estacionamiento

## 7. EQUIPAMIENTOS Y SERVICIOS INTERNOS

### 7a. Baños

Esta sección pretende identificar las características de los baños, cantidad, costo y

7a.1. ¿El parque cuenta con baños?

- 1 ☐ Sí  
2 ☐ No

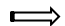

*Pasa a sección 7b*

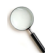

7a.2. ¿Cuántos baños hay?

7a.3. ¿Cuántos de los baños están abiertos?

7a.4. ¿Los baños tienen un costo?

- 1 ☐ Sí  
2 ☐ No

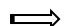

*Pasa a 7a.6*

7a.5. ¿Cuánto cuesta usar el baño?

\$ 

7a.6. ¿Hay baños para discapacitados?

- 1 ☐ Sí  
2 ☐ No

7a.7. ¿Cuántos de los baños están etiquetados por género (hombre/mujer)?

- 1 ☐ Todos
- 2 ☐ Algunos
- 3 ☐ Ninguno

7a.8. ¿Cuántas de las tazas de baño funcionan?

- 1 ☐ Todas funcionan
- 2 ☐ Algunas tienen problemas o están en reparación
- 3 ☐ Ninguna funciona
- 4 ☐ No tiene tazas

7a.9. ¿Cuántos lavabos funcionan?

- 1 ☐ Todos funcionan
- 2 ☐ Algunas tienen problemas o están en reparación
- 3 ☐ Ninguna funciona
- 4 ☐ No tiene lavabo

7a.10. ¿La condición general de los baños es buena?

- 1 ☐ Totalmente de acuerdo
- 2 ☐ De acuerdo
- 3 ☐ Ni de acuerdo ni en desacuerdo
- 4 ☐ En desacuerdo
- 5 ☐ Totalmente en desacuerdo

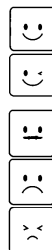

7a.11. Evaluar la cantidad de grafiti en los baños.

- 1 ☐ Mucho 
- 2 ☐ Algo 
- 3 ☐ Poco 
- 4 ☐ Nada 

7a.12. Identifica todos los servicios presentes en los baños. *Selecciona todas las que apliquen.*

| Sí |                          | No |                          |                                                   |
|----|--------------------------|----|--------------------------|---------------------------------------------------|
| 1  | <input type="checkbox"/> | 2  | <input type="checkbox"/> | Jabón                                             |
| 2  | <input type="checkbox"/> | 2  | <input type="checkbox"/> | Toallas de papel/Toallas de tela/Secadora de mano |
| 3  | <input type="checkbox"/> | 2  | <input type="checkbox"/> | Espejo                                            |
| 4  | <input type="checkbox"/> | 2  | <input type="checkbox"/> | Papel higiénico                                   |
| 5  | <input type="checkbox"/> | 2  | <input type="checkbox"/> | Botes de basura                                   |
| 6  | <input type="checkbox"/> | 2  | <input type="checkbox"/> | Agua (para lava manos y jalar tazas)              |
| 7  | <input type="checkbox"/> | 2  | <input type="checkbox"/> | Otra, ¿cuál? _____ (7a12_7a)                      |

7a.13. ¿Hay en al menos un baño cambiadores para bebés?

|   |                          |    |
|---|--------------------------|----|
| 1 | <input type="checkbox"/> | Sí |
| 2 | <input type="checkbox"/> | No |

#### 7b. Bebederos

Esta sección pretende identificar la existencia de bebederos, uso, condición e higiene.

7b.1. ¿El parque cuenta con bebederos?

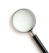

|   |                          |    |
|---|--------------------------|----|
| 1 | <input type="checkbox"/> | Sí |
| 2 | <input type="checkbox"/> | No |

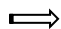

Pasa a sección 7c.

7b.2. ¿Cuántos bebederos hay?

|  |  |  |
|--|--|--|
|  |  |  |
|--|--|--|

7b.3. ¿Cuántos bebederos funcionan?

- 1 ☐ Todos funcionan
- 2 ☐ Algunos tienen problemas o están en reparación
- 3 ☐ Ninguno funciona
- 4 ☐ No se puede evaluar

7b.4. ¿La higiene de los bebederos es BUENA?

- |   |                          |                                |                                                                                   |
|---|--------------------------|--------------------------------|-----------------------------------------------------------------------------------|
| 1 | <input type="checkbox"/> | Totalmente de acuerdo          |  |
| 2 | <input type="checkbox"/> | De acuerdo                     |  |
| 3 | <input type="checkbox"/> | Ni de acuerdo ni en desacuerdo |  |
| 4 | <input type="checkbox"/> | En desacuerdo                  |  |
| 5 | <input type="checkbox"/> | Totalmente en desacuerdo       |  |

7b.5. ¿Qué tipo de bebedero hay?

- |   | Sí                       | No                       |                              |
|---|--------------------------|--------------------------|------------------------------|
| 1 | <input type="checkbox"/> | <input type="checkbox"/> | Manual con llave             |
| 2 | <input type="checkbox"/> | <input type="checkbox"/> | Manual con botón             |
| 3 | <input type="checkbox"/> | <input type="checkbox"/> | Eléctrico                    |
| 4 | <input type="checkbox"/> | <input type="checkbox"/> | Garrafrones                  |
| 5 | <input type="checkbox"/> | <input type="checkbox"/> | Otro, ¿Cuál? _____ (7b.5_5a) |

7b.6. ¿Hay instrucciones de forma de uso del bebedero?

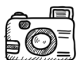

- 1 ☐ Sí
- 2 ☐ No
- 3 ☐ Sí, pero no son claras

7b.7. Observar la zona de bebederos por 5 minutos. Cuenta el número de personas que los utilizan, clasifícalas en 3 grupos (niños/adolescentes, adultos, adulto mayor)

|                    | Número |  |  |
|--------------------|--------|--|--|
| Niños/Adolescentes |        |  |  |
| Adultos            |        |  |  |
| Adulto mayor       |        |  |  |

7b.8. ¿Los bebederos están patrocinados por alguna marca?

- 1 ☐ Sí, ¿cuál? \_\_\_\_\_ (7b.8a)  
 2 ☐ No

### 7c. Basurero

Esta sección pretende identificar la cantidad y tipo de basura en el

7c.1. ¿El lugar cuenta con botes de basura?

- 1 ☐ Sí  
 2 ☐ No ➡ *Pasa a sección 7d.*

7c.2. ¿Aproximadamente, cuántos botes de basura hay en todo el parque?

|  |  |  |
|--|--|--|
|  |  |  |
|--|--|--|

7c.3. ¿Cuántos botes separan la basura? (orgánica e inorgánica u otro tipo de separación como PET, latas, etc.)

- 1 ☐ Todos están separados  
 2 ☐ Algunos están separados  
 3 ☐ Ninguno está separado

7c.4. ¿En general, cuánta basura hay dentro de los botes?

|   |       |                                                                                   |
|---|-------|-----------------------------------------------------------------------------------|
| 1 | Mucho |  |
| 2 | Algo  |  |
| 3 | Poco  |  |
| 4 | Nada  |  |

7c.5. ¿Hay basura en el parque, que no sea alrededor y/o dentro de los botes de basura?

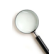

|   |                           |
|---|---------------------------|
| 1 | Sí, ¿Dónde? _____ (7c.5a) |
| 2 | No                        |

7c.6. ¿Cuánta basura “de riesgo” es visible en el parque? Por ejemplo: recipientes de alcohol, preservativos, medicamentos, vidrios, etc.)

|   |       |                                                                                     |
|---|-------|-------------------------------------------------------------------------------------|
| 1 | Mucho |    |
| 2 | Algo  |    |
| 3 | Poco  |   |
| 4 | Nada  |  |

7c.7. ¿Hay botes de basura para productos reciclables (ejemplo: periódico, vidrio, etc.)?

|   |                                           |
|---|-------------------------------------------|
| 1 | Sí, ¿qué tipo de productos? _____ (7c.7a) |
| 2 | No                                        |

#### 7d. Refugios de comida

Esta sección pretende identificar el uso de refugios y su condición.



\*Nota al encuestador:  
 Refugio de comida se refiere al lugar donde realizan convivios o fiestas.

7d.1. ¿El parque tiene refugios?

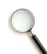

- 1 ☐ Sí  
 2 ☐ No

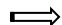

Pasa a sección 7e.

7d.2. ¿Qué se localiza debajo de los refugios? Señala todas las que aplican.

| Sí |                          | No |                          |                              |
|----|--------------------------|----|--------------------------|------------------------------|
| 1  | <input type="checkbox"/> | 2  | <input type="checkbox"/> | Asadores                     |
| 2  | <input type="checkbox"/> | 2  | <input type="checkbox"/> | Bancas                       |
| 3  | <input type="checkbox"/> | 2  | <input type="checkbox"/> | Mesas                        |
| 4  | <input type="checkbox"/> | 2  | <input type="checkbox"/> | Baños                        |
| 5  | <input type="checkbox"/> | 2  | <input type="checkbox"/> | Fuentes de bebidas           |
| 6  | <input type="checkbox"/> | 2  | <input type="checkbox"/> | Otro, ¿Cuál? _____ (7d.2_6a) |

7d.3. ¿La condición en general de los refugios es BUENA?

|   |                          |                                |  |
|---|--------------------------|--------------------------------|--|
| 1 | <input type="checkbox"/> | Totalmente de acuerdo          |  |
| 2 | <input type="checkbox"/> | De acuerdo                     |  |
| 3 | <input type="checkbox"/> | Ni de acuerdo ni en desacuerdo |  |
| 4 | <input type="checkbox"/> | En desacuerdo                  |  |
| 5 | <input type="checkbox"/> | Totalmente en desacuerdo       |  |

7d.4. ¿Existen señales que indiquen una política de reservación?

- 1 ☐ No  
 2 ☐ Sí, indican que las reservaciones son requeridas  
 3 ☐ Sí, indican que las reservaciones no son requeridas

## 7e. Bancas

Esta sección pretende identificar el número y condición de bancas dentro del parque.

7e.1. ¿Hay bancas en el parque?

|   |                          |    |   |                               |
|---|--------------------------|----|---|-------------------------------|
| 1 | <input type="checkbox"/> | Sí | ⇒ | <div>Pasa a sección 7f.</div> |
| 2 | <input type="checkbox"/> | No |   |                               |

7e.2. ¿La condición de los lugares para sentarse es buena?

|   |                          |                                |                          |
|---|--------------------------|--------------------------------|--------------------------|
| 1 | <input type="checkbox"/> | Totalmente de acuerdo          | <input type="checkbox"/> |
| 2 | <input type="checkbox"/> | De acuerdo                     | <input type="checkbox"/> |
| 3 | <input type="checkbox"/> | Ni de acuerdo ni en desacuerdo | <input type="checkbox"/> |
| 4 | <input type="checkbox"/> | En desacuerdo                  | <input type="checkbox"/> |
| 5 | <input type="checkbox"/> | Totalmente en desacuerdo       | <input type="checkbox"/> |

## 7f. Gimnasio

Esta sección pretende conocer si los parques cuentan con gimnasio al aire libre o cerrados.

7f.1. ¿El parque cuenta con gimnasio al aire libre?

|   |                          |    |   |                        |
|---|--------------------------|----|---|------------------------|
| 1 | <input type="checkbox"/> | Sí | ⇒ | <div>Pasa a 7f.5</div> |
| 2 | <input type="checkbox"/> | No |   |                        |

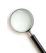

7f.2. ¿El gimnasio al aire libre se encuentra en buena condición?

|   |                          |                                |                          |
|---|--------------------------|--------------------------------|--------------------------|
| 1 | <input type="checkbox"/> | Totalmente de acuerdo          | <input type="checkbox"/> |
| 2 | <input type="checkbox"/> | De acuerdo                     | <input type="checkbox"/> |
| 3 | <input type="checkbox"/> | Ni de acuerdo ni en desacuerdo | <input type="checkbox"/> |
| 4 | <input type="checkbox"/> | En desacuerdo                  | <input type="checkbox"/> |
| 5 | <input type="checkbox"/> | Totalmente en desacuerdo       | <input type="checkbox"/> |

7f.3. ¿El gimnasio al aire libre está siendo utilizado?

|   |                          |    |
|---|--------------------------|----|
| 1 | <input type="checkbox"/> | Si |
| 2 | <input type="checkbox"/> | No |

7f.4. ¿Qué tipo de actividad se puede realizar en el gimnasio al aire libre? (señala todas las que apliquen)

|     | Sí                       | No                       |                                      |
|-----|--------------------------|--------------------------|--------------------------------------|
| 1   | <input type="checkbox"/> | <input type="checkbox"/> | Caminadora flotante                  |
| 2   | <input type="checkbox"/> | <input type="checkbox"/> | Caminadora elíptica                  |
| 3   | <input type="checkbox"/> | <input type="checkbox"/> | Potro                                |
| 4   | <input type="checkbox"/> | <input type="checkbox"/> | Remadora                             |
| 5   | <input type="checkbox"/> | <input type="checkbox"/> | Tablas abdominales                   |
| 6   | <input type="checkbox"/> | <input type="checkbox"/> | Multifuncional sencillo              |
| 7   | <input type="checkbox"/> | <input type="checkbox"/> | Bicicleta                            |
| 8   | <input type="checkbox"/> | <input type="checkbox"/> | Esquiadora                           |
| 9   | <input type="checkbox"/> | <input type="checkbox"/> | Press de espalda                     |
| 10  | <input type="checkbox"/> | <input type="checkbox"/> | Barras paralelas                     |
| 11  | <input type="checkbox"/> | <input type="checkbox"/> | Press de pecho                       |
| 12  | <input type="checkbox"/> | <input type="checkbox"/> | Aros ejercicio                       |
| 13  | <input type="checkbox"/> | <input type="checkbox"/> | Press de pierna                      |
| 14  | <input type="checkbox"/> | <input type="checkbox"/> | Aros y cintura                       |
| 15  | <input type="checkbox"/> | <input type="checkbox"/> | Twist de cintura                     |
| 16  | <input type="checkbox"/> | <input type="checkbox"/> | Masaje de espalda                    |
| 17  | <input type="checkbox"/> | <input type="checkbox"/> | Masaje de hombro                     |
| 18  | <input type="checkbox"/> | <input type="checkbox"/> | Tabla de surf                        |
| 19  | <input type="checkbox"/> | <input type="checkbox"/> | Otro, especificar _____ (7f.4_19.1)  |
| 19a | <input type="checkbox"/> | <input type="checkbox"/> | Otro, especificar _____ (7f.4_19.1a) |
| 19b | <input type="checkbox"/> | <input type="checkbox"/> | Otro, especificar _____ (7f.4_19.1b) |

7f.5. ¿El parque cuenta con gimnasio cerrado?

- 1 ☐ Sí  
2 ☐ No

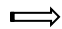

Pasa a sección 8 "Salud, nutrición e higiene".

7f.6. ¿Qué tipo de actividades se pueden realizar en el gimnasio cerrado? *Enlista todas las actividades.*

---

---

---

---

7f.7. ¿El parque cuenta con entrenadores o preparadores físicos?

- 1 ☐ Sí, ¿dónde se encuentran? \_\_\_\_\_ (7f.7.1)  
2 ☐ No

## 8. SALUD, NUTRICIÓN E HIGIENE.

### 8a. Salud.

8a.1 ¿Existe servicio médico dentro del parque?

- 1 ☐ Sí  
2 ☐ No

### 8b. Nutrición: publicidad

Está sección pretende identificar la publicidad dentro y fuera de los parques, así como los establecimientos de alimentos.

8b.1. ¿Existe publicidad de alimentos y bebidas dentro del parque?

- 1 ☐ Sí  
2 ☐ No

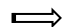

Pasa a 8b.4

8b.2. Señale todos los elementos donde haya publicidad dentro del parque.

|   | Sí                       | No                       |                                         |
|---|--------------------------|--------------------------|-----------------------------------------|
| 1 | <input type="checkbox"/> | <input type="checkbox"/> | En el camino/ruta/pista                 |
| 2 | <input type="checkbox"/> | <input type="checkbox"/> | En los botes de basura                  |
| 3 | <input type="checkbox"/> | <input type="checkbox"/> | En tableros específicos para publicidad |
| 4 | <input type="checkbox"/> | <input type="checkbox"/> | En la cara interior de las bardas       |
| 5 | <input type="checkbox"/> | <input type="checkbox"/> | En las bancas                           |
| 6 | <input type="checkbox"/> | <input type="checkbox"/> | En kioscos centrales                    |
| 7 | <input type="checkbox"/> | <input type="checkbox"/> | En la entrada del parque                |
| 8 | <input type="checkbox"/> | <input type="checkbox"/> | Otro, ¿Cuál? _____ (8b.2_8a)            |

8b.3. Para cada anuncio observado, rellena los siguientes incisos (2-4) usando la escala que aparece hasta abajo del cuadro.

| 1. Número de anuncio | 2. Tipo de producto del anuncio                                                                                                                                                                                                                                                                                                                                                                                                                                                                                                                                                                                                                                       | 3. Canal de comunicación                                                                                                                                                                                                                                                  | 4. Tipo de promoción                                                                                                                                                                                                                                                                                                                                                                                | 5. Tipo de personaje                                                                                                                                                                    |
|----------------------|-----------------------------------------------------------------------------------------------------------------------------------------------------------------------------------------------------------------------------------------------------------------------------------------------------------------------------------------------------------------------------------------------------------------------------------------------------------------------------------------------------------------------------------------------------------------------------------------------------------------------------------------------------------------------|---------------------------------------------------------------------------------------------------------------------------------------------------------------------------------------------------------------------------------------------------------------------------|-----------------------------------------------------------------------------------------------------------------------------------------------------------------------------------------------------------------------------------------------------------------------------------------------------------------------------------------------------------------------------------------------------|-----------------------------------------------------------------------------------------------------------------------------------------------------------------------------------------|
|                      |                                                                                                                                                                                                                                                                                                                                                                                                                                                                                                                                                                                                                                                                       |                                                                                                                                                                                                                                                                           |                                                                                                                                                                                                                                                                                                                                                                                                     |                                                                                                                                                                                         |
|                      |                                                                                                                                                                                                                                                                                                                                                                                                                                                                                                                                                                                                                                                                       |                                                                                                                                                                                                                                                                           |                                                                                                                                                                                                                                                                                                                                                                                                     |                                                                                                                                                                                         |
|                      |                                                                                                                                                                                                                                                                                                                                                                                                                                                                                                                                                                                                                                                                       |                                                                                                                                                                                                                                                                           |                                                                                                                                                                                                                                                                                                                                                                                                     |                                                                                                                                                                                         |
|                      |                                                                                                                                                                                                                                                                                                                                                                                                                                                                                                                                                                                                                                                                       |                                                                                                                                                                                                                                                                           |                                                                                                                                                                                                                                                                                                                                                                                                     |                                                                                                                                                                                         |
|                      |                                                                                                                                                                                                                                                                                                                                                                                                                                                                                                                                                                                                                                                                       |                                                                                                                                                                                                                                                                           |                                                                                                                                                                                                                                                                                                                                                                                                     |                                                                                                                                                                                         |
|                      |                                                                                                                                                                                                                                                                                                                                                                                                                                                                                                                                                                                                                                                                       |                                                                                                                                                                                                                                                                           |                                                                                                                                                                                                                                                                                                                                                                                                     |                                                                                                                                                                                         |
| Números (1 al 100)   | 1- chocolates, dulces, confiterías, barras de energía y untables<br>2- pasteles, galletas dulces, mezclas y masas para hacer pasteles<br>3- botanas saladas (palomitas, frituras de maíz, nueces, cacahuates y papas fritas)<br>4- jugos procesados<br>5- lácteos con azúcar (lácteos fermentados, yogurt con azúcares, leches saborizadas y quesos)<br>6- lácteos y derivados (leches, quesos y cremas)<br>7- bebidas energéticas<br>8- refrescos y otras bebidas gaseosas (incluyendo bebidas light<br>9- cereales de desayuno<br>10- comida preparada (hamburguesas, pastas, pizzas y sándwiches)<br>11- aceites y mantequillas<br>12- panes y productos similares | 1- cartel/poster<br>2- pintadas en la pared<br>3- mantas/pancarta<br>4- refrigeradores<br>5- anuncio iluminado<br>6- persona disfrazada<br>7- carpa con persona animando y haciendo concurso<br>8- anuncio con movimiento (pantalla)<br>9- barda<br>10- otro: especificar | 1- sin promoción<br>2- concurso<br>3- sorteos<br>4- regalos<br>5- precio (descuento)<br>6- mas producto (2x1)<br>7- ligada con terceros (en la compra de uno llevas otro de regalo)<br>8- cupones<br>9- registro por internet<br>10- personaje (deportistas famosos, caricaturas o artistas)<br>11- invitación a eventos o conciertos<br>12- obsequios de productos nuevos<br>13- otro: especificar | 1- caricaturas<br>2- personajes con una licencia (dora la exploradora)<br>3- deportistas famosos<br>4- celebridades no deportivas<br>5- personales de películas<br>6- equipo de famosos |

|  |                                                                                                                                                                                                                                                               |  |  |                                                                                                         |
|--|---------------------------------------------------------------------------------------------------------------------------------------------------------------------------------------------------------------------------------------------------------------|--|--|---------------------------------------------------------------------------------------------------------|
|  | 13- pastas, arroz y granos<br>14- carne, pollo, pescado procesado (salchicha, jamón, atún enlatado y otros embutidos)<br>15- frutas y verduras procesadas<br>16- salsa, dip y aderezo<br>17- bebidas alcohólicas<br>18- agua natural<br>19- otro: especificar |  |  | 7- ni deportistas ni históricos (personajes de navidad)<br>8- imágenes de niños<br>9- otro: especificar |
|--|---------------------------------------------------------------------------------------------------------------------------------------------------------------------------------------------------------------------------------------------------------------|--|--|---------------------------------------------------------------------------------------------------------|

8b.4. ¿Existe publicidad de alimentos y bebidas alrededor del parque?

1 ☐ Si  
 2 ☐ No  $\Rightarrow$  Pasa a sección 8c.

8b.5. Señale todos los elementos donde haya publicidad alrededor del parque.

|   | Sí                       | No                       |                                             |
|---|--------------------------|--------------------------|---------------------------------------------|
| 1 | <input type="checkbox"/> | <input type="checkbox"/> | Alrededor de las bardas del parque          |
| 2 | <input type="checkbox"/> | <input type="checkbox"/> | Mupis (publicidad en las paradas de camión) |
| 3 | <input type="checkbox"/> | <input type="checkbox"/> | Posters                                     |
| 4 | <input type="checkbox"/> | <input type="checkbox"/> | Vallas/rejas                                |
| 5 | <input type="checkbox"/> | <input type="checkbox"/> | En las bancas                               |
| 6 | <input type="checkbox"/> | <input type="checkbox"/> | Otro, ¿Cuál? _____ (8b.5_6a)                |

8b.6. Para cada anuncio observado, rellena los siguientes incisos (2-4) usando la escala que aparece hasta abajo del cuadro.

| 1. Número de anuncio | 2. Tipo de producto del anuncio                                  | 3. Canal de comunicación                    | 4. Tipo de promoción                          | 5. Tipo de personaje |
|----------------------|------------------------------------------------------------------|---------------------------------------------|-----------------------------------------------|----------------------|
|                      |                                                                  |                                             |                                               |                      |
|                      |                                                                  |                                             |                                               |                      |
|                      |                                                                  |                                             |                                               |                      |
|                      |                                                                  |                                             |                                               |                      |
|                      |                                                                  |                                             |                                               |                      |
|                      |                                                                  |                                             |                                               |                      |
| Números (1 al 100)   | 1- chocolates, dulces, confiterías, barras de energía y untables | 1- cartel/poster<br>2- pintadas en la pared | 1- sin promoción<br>2- concurso<br>3- sorteos | 1- caricaturas       |

|                                                                                                                                                                                                                                                                                                                                                                                                                                                                                                                                                                                                                                                                                                                                                                                                                                                                    |                                                                                                                                                                                                                            |                                                                                                                                                                                                                                                                                                                                                    |                                                                                                                                                                                                                                                                                  |
|--------------------------------------------------------------------------------------------------------------------------------------------------------------------------------------------------------------------------------------------------------------------------------------------------------------------------------------------------------------------------------------------------------------------------------------------------------------------------------------------------------------------------------------------------------------------------------------------------------------------------------------------------------------------------------------------------------------------------------------------------------------------------------------------------------------------------------------------------------------------|----------------------------------------------------------------------------------------------------------------------------------------------------------------------------------------------------------------------------|----------------------------------------------------------------------------------------------------------------------------------------------------------------------------------------------------------------------------------------------------------------------------------------------------------------------------------------------------|----------------------------------------------------------------------------------------------------------------------------------------------------------------------------------------------------------------------------------------------------------------------------------|
| 2- pasteles, galletas dulces, mezclas y masas para hacer pasteles<br>3- botanas saladas (palomitas, frituras de maíz, nueces, cacahuates y papas fritas)<br>4- jugos procesados<br>5- lácteos con azúcar (lácteos fermentados, yogurt con azúcares, leches saborizadas y quesos)<br>6- lácteos y derivados (leches, quesos y cremas)<br>7- bebidas energéticas<br>8- refrescos y otras bebidas gaseosas (incluyendo bebidas light<br>9- cereales de desayuno<br>10- comida preparada (hamburguesas, pastas, pizzas y sándwiches)<br>11- aceites y mantequillas<br>12- panes y productos similares<br>13- pastas, arroz y granos<br>14- carne, pollo, pescado procesado (salchicha, jamón, atún enlatado y otros embutidos)<br>15- frutas y verduras procesadas<br>16- salsa, dip y aderezo<br>17- bebidas alcohólicas<br>18- agua natural<br>19- otro: especificar | 3- mantas/pancarta<br>4- refrigeradores<br>5- anuncio iluminado<br>6- persona disfrazada<br>7- carpa con persona animando y haciendo concurso<br>8- anuncio con movimiento (pantalla)<br>9- barda<br>10- otro: especificar | 4- regalos<br>5- precio (descuento)<br>6- mas producto (2x1)<br>7- ligada con terceros (en la compra de uno llevas otro de regalo)<br>8- cupones<br>9- registro por internet<br>10- personaje (deportistas famosos, caricaturas o artistas)<br>11- invitación a eventos o conciertos<br>12- obsequios de productos nuevos<br>13- otro: especificar | 2- personajes con una licencia (dora la exploradora)<br>3- deportistas famosos<br>4- celebridades no deportivas<br>5- personales de películas<br>6- equipo de famosos<br>7- ni deportistas ni históricos (personajes de navidad)<br>8- imágenes de niños<br>9- otro: especificar |
|--------------------------------------------------------------------------------------------------------------------------------------------------------------------------------------------------------------------------------------------------------------------------------------------------------------------------------------------------------------------------------------------------------------------------------------------------------------------------------------------------------------------------------------------------------------------------------------------------------------------------------------------------------------------------------------------------------------------------------------------------------------------------------------------------------------------------------------------------------------------|----------------------------------------------------------------------------------------------------------------------------------------------------------------------------------------------------------------------------|----------------------------------------------------------------------------------------------------------------------------------------------------------------------------------------------------------------------------------------------------------------------------------------------------------------------------------------------------|----------------------------------------------------------------------------------------------------------------------------------------------------------------------------------------------------------------------------------------------------------------------------------|

### 8c. Nutrición: Establecimientos alimenticios

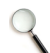

8c.1. ¿Hay venta de alimentos y/o bebidas dentro del parque?

- 1 ☐ Si  
 2 ☐ No

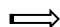

*Pasa a sección 8c.3*

8c.2. Para cada establecimiento, rellena los siguientes incisos (2-3) usando la escala que aparece hasta abajo del cuadro.

| 1. Número de puesto | 2. Tipo de puesto (fijo o ambulante): | 3. Tipo de productos que se venden en el puesto (seleccionar solo 1) |
|---------------------|---------------------------------------|----------------------------------------------------------------------|
|                     |                                       |                                                                      |
|                     |                                       |                                                                      |
|                     |                                       |                                                                      |
|                     |                                       |                                                                      |
|                     |                                       |                                                                      |
|                     |                                       |                                                                      |
|                     |                                       |                                                                      |

|                    |                                                                                                                                                                                                                                         |                                                                                                                                                                                                                                                                                                                                                                                                                            |
|--------------------|-----------------------------------------------------------------------------------------------------------------------------------------------------------------------------------------------------------------------------------------|----------------------------------------------------------------------------------------------------------------------------------------------------------------------------------------------------------------------------------------------------------------------------------------------------------------------------------------------------------------------------------------------------------------------------|
| Números (1 al 100) | 1 tienda de abarrotes<br>2 supermercado<br>3 minisuper<br>4 tienda de conveniencia (oxxo, seven)<br>5 puesto fijo (metal)<br>6 puesto desmontable<br>7 carrito<br>8 bicicleta<br>9 carretilla<br>10 en el piso<br>11 otro, especificar: | 1 fritanga<br>2 hamburguesa y hot dog<br>3 puesto de chicharrones y papas<br>4 frutas y verduras<br>5 taquería<br>6 esquites<br>7 dulces empaquetados<br>8 gorditas de nata<br>9 helados, nieves y paletas<br>10 jugos y licuados<br>11 tamal y atole<br>12 bebidas azucaradas, energética y agua<br>13 tortas y sándwich<br>14 palomitas<br>15 puesto de algodón<br>16 nueces, semillas y dulces<br>17 otro, especificar: |
|--------------------|-----------------------------------------------------------------------------------------------------------------------------------------------------------------------------------------------------------------------------------------|----------------------------------------------------------------------------------------------------------------------------------------------------------------------------------------------------------------------------------------------------------------------------------------------------------------------------------------------------------------------------------------------------------------------------|

8c.3. ¿Hay venta de alimentos y/o bebidas alrededor del parque?

1 ☐ Si

2 ☐ No

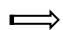

*Pasa a sección 8d.*

8c.4. Para cada establecimiento, rellena los siguientes incisos (2-3) usando la escala que aparece hasta abajo del cuadro.

| 1. Número de puesto | 2. Tipo de puesto (fijo o ambulante):                                                                                                                                                                          | 3. Tipo de productos que se venden en el puesto (seleccionar solo 1)                                                                                                                                                              |
|---------------------|----------------------------------------------------------------------------------------------------------------------------------------------------------------------------------------------------------------|-----------------------------------------------------------------------------------------------------------------------------------------------------------------------------------------------------------------------------------|
|                     |                                                                                                                                                                                                                |                                                                                                                                                                                                                                   |
|                     |                                                                                                                                                                                                                |                                                                                                                                                                                                                                   |
|                     |                                                                                                                                                                                                                |                                                                                                                                                                                                                                   |
|                     |                                                                                                                                                                                                                |                                                                                                                                                                                                                                   |
|                     |                                                                                                                                                                                                                |                                                                                                                                                                                                                                   |
|                     |                                                                                                                                                                                                                |                                                                                                                                                                                                                                   |
|                     |                                                                                                                                                                                                                |                                                                                                                                                                                                                                   |
| Números (1 al 100)  | 1 tienda de abarrotes<br>2 supermercado<br>3 minisuper<br>4 tienda de conveniencia (oxxo, seven)<br>5 puesto fijo (metal)<br>6 puesto desmontable<br>7 carrito<br>8 bicicleta<br>9 carretilla<br>10 en el piso | 1 fritanga<br>2 hamburguesa y hot dog<br>3 puesto de chicharrones y papas<br>4 frutas y verduras<br>5 taquería<br>6 esquites<br>7 dulces empaquetados<br>8 gorditas de nata<br>9 helados, nieves y paletas<br>10 jugos y licuados |



|  |                                                                                                                      |                                                                                                                                                                                                                                                                               |
|--|----------------------------------------------------------------------------------------------------------------------|-------------------------------------------------------------------------------------------------------------------------------------------------------------------------------------------------------------------------------------------------------------------------------|
|  | 11 Restaurant<br>12 Cafetería<br>13 Fonda<br>14 Paletaería<br>15 Tamalería<br>16 Pastelería<br>17 otro, especificar: | 11 tamal y atole<br>12 bebidas azucaradas, energética y agua<br>13 tortas y sándwich<br>14 palomitas<br>15 puesto de algodón<br>16 nueces, semillas y dulces<br>17 Marisquería<br>18 Pizza<br>19 Tortas<br>20 Mixiotes<br>21 Sopas<br>22 Misceláneos<br>23 otro, especificar: |
|--|----------------------------------------------------------------------------------------------------------------------|-------------------------------------------------------------------------------------------------------------------------------------------------------------------------------------------------------------------------------------------------------------------------------|

#### 8d. Higiene: Mascotas

Esta sección pretende identificar si hay presencia de mascotas en el parque, así como los comportamientos de los usuarios.

8d.1. ¿Hay anuncio que restringe el acceso a mascotas?

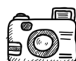

- 1 ☐ Sí  
 2 ☐ No

8d.2. ¿Hay algún anuncio especificando si los perros están obligados a estar con correa o a permanecer en un área específica del parque?

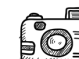

- 1 ☐ Sí  
 2 ☐ No  
 3 ☐ No sé (porque los anuncios no especifican o no se ven claramente)

8d.3. ¿Hay algún anuncio especificando donde desechar el excremento de las mascotas?

- 1 ☐ Sí  
 2 ☐ No  
 3 ☐ No sé (porque los anuncios no especifican o no se ven claramente)

8d.4. ¿Existen lugares específicos para tirar el excremento?

- 1 ☐ Sí, ¿Cuál? \_\_\_\_\_ (8d.4a)  
 2 ☐ No

8d.5. ¿Existe un lugar especial para perros?

- 1 ☐ Si, ¿Cuál? \_\_\_\_\_ (8d.5a)  
 2 ☐ No

**8e. Higiene: comportamientos permitidos o restringidos.**

Esta sección pretende identificar los comportamientos dentro del parque como: escupir, arrojar chicles y fumar.

8e.1. ¿Hay señalización para no escupir?

- 1 ☐ Sí  
 2 ☐ No

8e.2. Observa por 5 minutos y cuenta el número de personas que escupen, clasifícalas en 3 grupos (niños/adolescentes, adultos, adulto mayor)

1. Niños/Adolescentes
2. Adultos
3. Adulto mayor
4. No se observó gente escupiendo

| Número |
|--------|
|        |
|        |
|        |
|        |

8e.3. ¿Hay señalización para no arrojar chicles en el parque?

- 1 ☐ Si  
 2 ☐ No

8e.4. Observar por 5 minutos y cuenta el número de personas que arroja chicles al parque, si observas personas clasifícalas en 3 grupos (niños/adolescentes, adultos, adulto mayor)

|                                          | Número |
|------------------------------------------|--------|
| 1. Niños/Adolescentes                    |        |
| 2. Adultos                               |        |
| 3. Adulto mayor                          |        |
| 4. No se observó gente arrojando chicles |        |

8e.5. ¿Hay señalización restrictiva para no fumar?

1 ☐ Si  
 2 ☐ No

8e.6. Observar por 5 minutos y cuenta el número de personas que fuman, si observas personas clasifícalas en 3 grupos (adolescentes, adultos, adulto mayor)

|                                | Número |
|--------------------------------|--------|
| 1. Niños/Adolescentes          |        |
| 2. Adultos                     |        |
| 3. Adulto mayor                |        |
| 4. No se observó gente fumando |        |

8e.7. ¿Existen áreas donde esté permitido fumar?

1 ☐ Si, ¿Dónde? \_\_\_\_\_ (8e.7a)  
 2 ☐ No

## 9. ADMINISTRACIÓN Y MANTENIMIENTO

Esta sección pretende conocer quien administra el parque, así como las distintas funciones de administración y mantenimiento.

9.1. ¿Quién administra el lugar?

|   | Sí                       | No                       |                                                              |
|---|--------------------------|--------------------------|--------------------------------------------------------------|
| 1 | <input type="checkbox"/> | <input type="checkbox"/> | SEMARNAT (Secretaría de Medio Ambiente y Recursos Naturales) |
| 2 | <input type="checkbox"/> | <input type="checkbox"/> | SEDEMA (Secretaría de Medio Ambiente de la Ciudad de México) |
| 3 | <input type="checkbox"/> | <input type="checkbox"/> | Alcaldía                                                     |
| 4 | <input type="checkbox"/> | <input type="checkbox"/> | Se desconoce                                                 |
| 5 | <input type="checkbox"/> | <input type="checkbox"/> | Otro, ¿Cuál? _____ (9.1_5a)                                  |

9.2. Preguntar a los administradores ¿De dónde vienen los recursos para el mantenimiento del parque?

|  |
|--|
|  |
|  |
|  |
|  |

9.3. ¿Observas trabajadores del parque uniformados?

|   |                          |                                         |
|---|--------------------------|-----------------------------------------|
| 1 | <input type="checkbox"/> | Sí, ¿qué dice su uniforme? _____ (9.3a) |
| 2 | <input type="checkbox"/> | No                                      |

9.4. ¿Qué tareas desempeñaban los trabajadores presentes en el parque?

| 1. Tipo de trabajador | 2. Zona | 3. Número de trabajadores | 4. Horarios |
|-----------------------|---------|---------------------------|-------------|
|                       |         |                           |             |
|                       |         |                           |             |
|                       |         |                           |             |
|                       |         |                           |             |
|                       |         |                           |             |
|                       |         |                           |             |
|                       |         |                           |             |

9.5. ¿Existe algún tipo de señalamiento de apropiación del parque?

- 1 ☐ Sí, ¿cuál? (por ejemplo: anuncios de la CDMX, SEDEMA, etc.) \_\_\_\_\_(9.5.1)  
2 ☐ No

**\*FIN DEL CUESTIONARIO\***
