# Supplementary material for: Development and Validation of the Mexican Public Open Spaces Tool (MexPOS)
Source: MDPI journal article supplement (doi:10.3390/ijerph19138198), 2022-07-05
Supplement: s1 [file s1]

Table S1. Model I

| Factors                              | Items                                                                               |
|--------------------------------------|-------------------------------------------------------------------------------------|
| <b>Factor 1</b><br>( $\alpha=0.43$ ) | Do you observe uniformed park workers?                                              |
|                                      | Do you hear other sounds not mentioned above?                                       |
|                                      | Is there food and beverage advertising inside the park? *                           |
|                                      | Does the park have parking facilities for motorbikes?                               |
|                                      | Are there advertisements promoting cakes, cookies, or cake dough inside the park? * |
|                                      | Are there signs indicating whether dogs must be on a leash or in a specific area?   |
|                                      | Is the land use around the park mainly commercial? *                                |
|                                      | Are there signs restricting bicycle parking area inside the park?                   |
|                                      | Are there guardhouses in the park?                                                  |
|                                      | Have there been any security incidents so far these years?                          |
|                                      | Based on what you observed today, is the parks attractive to you?                   |
|                                      | In general, what is the percentage of wooded areas in the park?                     |
|                                      | Does the park have historical, educational, or artistic features?                   |
|                                      | Is the condition of the landscape adequate?                                         |
| <b>Factor 2</b><br>( $\alpha=0.73$ ) | Is the condition of the sidewalks bad? *                                            |
|                                      | Is there garbage around the park? *                                                 |
|                                      | Are there empty or unpleasant buildings around the park? *                          |
|                                      | What other areas for activities did you observe?                                    |
|                                      | Are there properties around the park in poor condition?                             |
|                                      | Is there a fronton court inside the park?                                           |
|                                      | Are all areas of the park open to the public?                                       |
|                                      | Is there a bike path inside the park?                                               |
|                                      | Is there a football/soccer court inside the park?                                   |
|                                      | Are there any indicators of who oversees the park?                                  |
|                                      | Is there a stationary bike in the outdoor gym?                                      |
|                                      | Are there any creeks, lakes or ponds inside the park?                               |
|                                      | Is there electric lightning inside the park?                                        |
|                                      | Are there other areas of activities not mentioned above?                            |
|                                      | Is there a map of the park?                                                         |
|                                      | Are there botanical gardens inside the park?                                        |
|                                      | Does the park have a parking lot for cars?                                          |
|                                      | Does the opening or operation of the park depend on a janitor or manager?           |
|                                      | Does the park have shelters?                                                        |
|                                      | Is there a 5-a-side football/soccer court inside the park?                          |
|                                      | Are there abdominal boards in the outdoor gym?                                      |
|                                      | Is the park fenced or gated?                                                        |
|                                      | Are there police stations inside the park?                                          |
|                                      | Is there a shared trail around the park?                                            |
|                                      | Does the park have bathrooms?                                                       |
|                                      | Are there public transportation stops in sight near the park? *                     |
|                                      | Is the outdoor gym being used?                                                      |
| <b>Factor 3</b><br>( $\alpha=0.49$ ) | Is there any sign of the appropriation of the park?                                 |
|                                      | Is there a skatepark area inside the park?                                          |

|                                      |                                                                                                 |
|--------------------------------------|-------------------------------------------------------------------------------------------------|
|                                      | Are there signs indicating other signage not mentioned above?                                   |
|                                      | Are there signs indicating where to dispose pet excrement?                                      |
|                                      | Are there posters promoting events inside the park?                                             |
|                                      | Are there garbage containers for recyclable products?                                           |
|                                      | Is there medical service inside the park?                                                       |
|                                      | Are there signs indicating the park's schedule of operation?                                    |
|                                      | Are there no parking signs around the park?                                                     |
|                                      | Are there bars in the outdoor gym?                                                              |
| <b>Factor 4</b><br>( $\alpha=0.43$ ) | Is the main land use inside the park natural?                                                   |
|                                      | Is there a shoulder massage machine in the outdoor gym?                                         |
|                                      | Do you hear music sounds inside the park?                                                       |
|                                      | Do you hear voices sounds inside the park?                                                      |
|                                      | Are there streets with sidewalks around the park?                                               |
|                                      | How much hazardous waste is visible in the park? (e.g., alcohol containers, preservatives...) * |
|                                      | Does the outdoor gym have a surfboard?                                                          |
|                                      | Is there any other apparatus not mentioned above inside the outdoor gym?                        |
|                                      | Does the outdoor gym have a back massage machine?                                               |
|                                      | Is the solar panel lighting inside the park?                                                    |
|                                      | Is the waist twist inside the outdoor gym?                                                      |
|                                      | Are there signs indicating whether the park has equipment for rental?                           |
|                                      | Is the outdoor gymnasium in good condition?                                                     |
|                                      | Does the park have lighting?                                                                    |
|                                      | Are there any announcements indicating the road, route, track of higher hierarchy?              |
| <b>Factor 5</b><br>( $\alpha=0.41$ ) | Does the park have a street inside?                                                             |
|                                      | Is there a bike route that leads to the park?                                                   |
|                                      | Do you see graffiti around the park? *                                                          |
|                                      | Is there poor street lighting around the park?                                                  |
|                                      | Are the eating areas in good condition?                                                         |
|                                      | In total, how much of the park could be shaded?                                                 |
|                                      | Are the green areas in good condition?                                                          |
|                                      | Does the park have parking facilities for bikes?                                                |
| <b>Factor 6</b><br>( $\alpha=0.6$ )  | Do you hear bird sound inside the park?                                                         |
|                                      | Does the park have handrails?                                                                   |
|                                      | Is the condition of these sidewalks regular? *                                                  |
|                                      | Is the condition of the sidewalks good?                                                         |
|                                      | Are there streets with zebra crossings around the park?                                         |
|                                      | Is there a police presence inside the park?                                                     |
|                                      | Is there a rowing machine in the outdoor gym?                                                   |
|                                      | Is the condition of the sidewalks regular?                                                      |
|                                      | Are people smoking inside the park? *                                                           |
|                                      | Does the park have ramps to guarantee access to the park?                                       |
|                                      | Is there a ski walker in the outdoor gym?                                                       |
| <b>Factor 7</b><br>( $\alpha=0.6$ )  | Are the seating areas in good condition?                                                        |
|                                      | Are the walking paths in good condition?                                                        |
|                                      | Is the playground area in good condition?                                                       |

|                                       |                                                                                |
|---------------------------------------|--------------------------------------------------------------------------------|
|                                       | Is there vandalism inside the park?                                            |
|                                       | Is the condition of the road/route/major trail good?                           |
|                                       | Is there a 7 football/soccer field in the park?                                |
|                                       | Are most of the streets around the park secondary?                             |
|                                       | In general, is the park well maintained?                                       |
|                                       | Is the state of the places to sit good?                                        |
|                                       | Are there security cameras inside the park?                                    |
| <b>Factor 8</b><br>( $\alpha=0.65$ )  | Are there courts that combine soccer and basketball?                           |
|                                       | Are most of the streets around the park tertiary?                              |
|                                       | Do you hear water sounds inside the park?                                      |
|                                       | Are there public transport stations within a 100m radius? *                    |
|                                       | Are most of the streets around the park primary? *                             |
|                                       | Is there excessive noise around the park? *                                    |
|                                       | Do you see panic buttons in the park?                                          |
|                                       | Do you observe animal excrement in the park? *                                 |
|                                       | Is heavy traffic around the park? *                                            |
| <b>Factor 9</b><br>( $\alpha=0.69$ )  | Are there streets with traffic lights around the park?                         |
|                                       | Are there any streets with pedestrian traffic lights around the park?          |
|                                       | Are there streets with safe crossings around the park?                         |
|                                       | Is there a floating treadmill in the outdoor gym?                              |
| <b>Factor 10</b><br>( $\alpha=0.28$ ) | Is there a leg press machine in the outdoor gym?                               |
|                                       | Is there garbage in the park, other than around and/o inside the trash cans? * |
|                                       | Are there pedestrian streets around the park?                                  |
|                                       | Does the park have drinking fountains?                                         |
| <b>Factor 11</b><br>( $\alpha=0.36$ ) | Is there a colt in the outdoor gym?                                            |
|                                       | Is there an elliptical trainer in the outdoor gym?                             |
|                                       | Does the outdoor gym have hoops?                                               |
|                                       | According to today's experience, is the smell of the park pleasant?            |
|                                       | Does the outdoor gym have hoops and a waistband?                               |
|                                       | Is there a basketball court inside the park?                                   |
| <b>Factor 12</b><br>( $\alpha=0.06$ ) | Is there any reference or sign indicating the name of the park?                |
|                                       | Is the land use around the park mainly institutional?                          |
|                                       | Are the trees the main source of shade in the park?                            |
|                                       | Is there any evidence of threatening people or behaviour?                      |
|                                       | Does the outdoor gym have a multifunctional machine?                           |
| <b>Factor 13</b><br>( $\alpha=0.06$ ) | Are there food and beverage stalls around the park? *                          |
|                                       | Is there a chest press machine in the outdoor gym?                             |
|                                       | Is there a jogging path inside the park?                                       |
|                                       | Do you hear traffic sounds inside the park? *                                  |
|                                       | Write down the number of stalls around the park*                               |

\* Reverse-coded items

**Table S2.** Model II

| Factors                                                                    | Items                                                                               |
|----------------------------------------------------------------------------|-------------------------------------------------------------------------------------|
| <b>Factor 1</b><br><b>Advertisement and land uses</b><br>( $\alpha=0.12$ ) | Do you observe uniformed park workers?                                              |
|                                                                            | Do you hear other sounds not mentioned above?                                       |
|                                                                            | Is there food and beverage advertising inside the park? *                           |
|                                                                            | Are there advertisements promoting cakes, cookies, or cake dough inside the park? * |
|                                                                            | Is the land use around the park mainly commercial? *                                |
|                                                                            | Based on what you observed today, is the parks attractive to you?                   |
|                                                                            | Is the condition of the landscape adequate?                                         |
| <b>Factor 2</b><br><b>Amenities and maintenance</b><br>( $\alpha=0.70$ )   | Is the land use around the park mainly institutional?                               |
|                                                                            | Are there food and beverage stalls around the park? *                               |
|                                                                            | Write down the number of stalls around the park. *                                  |
|                                                                            | Is the condition of the sidewalks bad? *                                            |
|                                                                            | Is there garbage around the park? *                                                 |
|                                                                            | Are there empty or unpleasant buildings around the park? *                          |
|                                                                            | What other areas for activities did you observe?                                    |
|                                                                            | Are there properties around the park in poor condition?                             |
|                                                                            | Is there a fronton court inside the park?                                           |
|                                                                            | Are all areas of the park open to the public?                                       |
|                                                                            | Is there a football/soccer court inside the park?                                   |
|                                                                            | Is there a stationary bike in the outdoor gym?                                      |
|                                                                            | Are there other areas of activities not mentioned above?                            |
|                                                                            | Is there a map of the park?                                                         |
|                                                                            | Are there botanical gardens inside the park?                                        |
|                                                                            | Does the park have a parking lot for cars?                                          |
|                                                                            | Does the opening or operation of the park depend on a janitor or manager?           |
|                                                                            | Does the park have shelters?                                                        |
|                                                                            | Is there a 5-a-side football/soccer court inside the park?                          |
|                                                                            | Are there abdominal boards in the outdoor gym?                                      |
|                                                                            | Is the park fenced or gated?                                                        |
|                                                                            | Does the park have bathrooms?                                                       |
|                                                                            | Are there public transportation stops in sight near the park? *                     |
|                                                                            | Is the outdoor gym being used?                                                      |
|                                                                            | Is there a rowing machine in the outdoor gym?                                       |
|                                                                            | Is there a ski walker in the outdoor gym?                                           |
|                                                                            | Is there a colt in the outdoor gym?                                                 |
|                                                                            | Is there an elliptical trainer in the outdoor gym?                                  |
|                                                                            | Is there a leg press machine in the outdoor gym?                                    |
|                                                                            | Does the outdoor gym have hoops?                                                    |
|                                                                            | Is there a chest press machine in the outdoor gym?                                  |
|                                                                            | Does the outdoor gym have a multifunctional machine?                                |
|                                                                            | Does the outdoor gym have hoops and a waistband?                                    |
|                                                                            | Are there bars in the outdoor gym?                                                  |
|                                                                            | Is there a floating treadmill in the outdoor gym?                                   |
|                                                                            | Is the playground area in good condition?                                           |

|                                                                      |                                                                                                 |
|----------------------------------------------------------------------|-------------------------------------------------------------------------------------------------|
|                                                                      | Is there a 7 football/soccer field in the park?                                                 |
|                                                                      | Are there courts that combine soccer and basketball?                                            |
|                                                                      | Is there a basketball court inside the park?                                                    |
|                                                                      | Does the park have historical, educational, or artistic features?                               |
|                                                                      | Is there a skatepark area inside the park?                                                      |
| <b>Factor 3<br/>Signs and<br/>announcements</b><br>( $\alpha=0.50$ ) | In general, is the park well maintained?                                                        |
|                                                                      | Is there medical service inside the park?                                                       |
|                                                                      | Does the park have parking facilities for motorbikes?                                           |
|                                                                      | Is there any sign of the appropriation of the park?                                             |
|                                                                      | Are there signs indicating other signage not mentioned above?                                   |
|                                                                      | Are there signs indicating where to dispose pet excrement?                                      |
|                                                                      | Are there posters promoting events inside the park?                                             |
|                                                                      | Are there garbage containers for recyclable products?                                           |
|                                                                      | Are these signs indicating the park's schedule of operation?                                    |
|                                                                      | Are there no parking signs around the park?                                                     |
|                                                                      | Are there signs indicating whether dogs must be on a leash or in a specific area?               |
|                                                                      | Is there any reference or sign indicating the name of the park?                                 |
|                                                                      | Are there any announcements indicating the road, route, track of higher hierarchy?              |
| <b>Factor 4<br/>Outdoor and<br/>activities</b><br>( $\alpha=0.45$ )  | Are there signs indicating whether the park has equipment for rental?                           |
|                                                                      | Are there any indicators of who oversees the park?                                              |
|                                                                      | Is the main land use inside the park natural?                                                   |
|                                                                      | Is there a shoulder massage machine in the outdoor gym?                                         |
|                                                                      | Do you hear music sounds inside the park?                                                       |
|                                                                      | Do you hear voices sounds inside the park?                                                      |
|                                                                      | Are there streets with sidewalks around the park?                                               |
|                                                                      | How much hazardous waste is visible in the park? (e.g., alcohol containers, preservatives...) * |
|                                                                      | Does the outdoor gym have a surfboard?                                                          |
|                                                                      | Is there any other apparatus not mentioned above inside the outdoor gym?                        |
|                                                                      | Does the outdoor gym have a back massage machine?                                               |
|                                                                      | Is the solar panel lighting inside the park?                                                    |
|                                                                      | Is the waist twist inside the outdoor gym?                                                      |
|                                                                      | Is the outdoor gymnasium in good condition?                                                     |
|                                                                      | Does the park have lighting?                                                                    |
|                                                                      | Does the park have drinking fountains?                                                          |
| <b>Factor 5<br/>Safety and<br/>cycling</b><br>( $\alpha=0.64$ )      | Are there any creeks, lakes, or ponds inside the park?                                          |
|                                                                      | In general, what is the percentage of wooded areas in the park?                                 |
|                                                                      | Does the park have a street inside?                                                             |
|                                                                      | Is there a bike route that leads to the park?                                                   |
|                                                                      | Do you see graffiti around the park? *                                                          |
|                                                                      | Is there poor street lighting in the area around the park?                                      |
|                                                                      | Are the eating areas in good condition?                                                         |
|                                                                      | In total, how much of the park could be shaded?                                                 |
|                                                                      | Are the green areas in good condition?                                                          |
|                                                                      | Does the park have parking facilities for bikes?                                                |

|                                                                                                                                                                 |                                                                                |
|-----------------------------------------------------------------------------------------------------------------------------------------------------------------|--------------------------------------------------------------------------------|
|                                                                                                                                                                 | Are there security cameras inside the park?                                    |
|                                                                                                                                                                 | Do you see panic buttons in the park?                                          |
|                                                                                                                                                                 | Is there vandalism inside the park?                                            |
|                                                                                                                                                                 | Is there a police presence inside the park?                                    |
|                                                                                                                                                                 | Is there electric lightning inside the park?                                   |
|                                                                                                                                                                 | Are there guardhouses in the park?                                             |
|                                                                                                                                                                 | Are there police stations inside the park?                                     |
|                                                                                                                                                                 | Have there been any security incidents so far these years?                     |
|                                                                                                                                                                 | Are there signs restricting bicycle parking area inside the park?              |
|                                                                                                                                                                 | Is the condition of the road/route/major trail good?                           |
|                                                                                                                                                                 | Is there a jogging path inside the park?                                       |
|                                                                                                                                                                 | Is there a bike path inside the park?                                          |
| <b>Factor 6<br/>Pedestrians</b><br>( $\alpha=0.61$ )                                                                                                            | Is there a shared trail around the park?                                       |
|                                                                                                                                                                 | Do you hear bird sound inside the park?                                        |
|                                                                                                                                                                 | Does the park have handrails?                                                  |
|                                                                                                                                                                 | Is the condition of these sidewalks regular? *                                 |
|                                                                                                                                                                 | Is the condition of the sidewalks good?                                        |
|                                                                                                                                                                 | Is the condition of the sidewalks regular?                                     |
|                                                                                                                                                                 | Are people smoking inside the park? *                                          |
|                                                                                                                                                                 | Does the park have ramps to guarantee access to the park?                      |
|                                                                                                                                                                 | Is there any evidence of threatening people or behaviour?                      |
|                                                                                                                                                                 | Are the seating areas in good condition?                                       |
| <i>The items from <b>Factor 7</b> were allocated to other factors in which they theoretically fit better as suggested by an expert group.</i>                   |                                                                                |
| <b>Factor 8<br/>Sensory elements</b><br>( $\alpha=0.61$ )                                                                                                       | Is the state of the places to sit good?                                        |
|                                                                                                                                                                 | Are the walking paths in good condition?                                       |
|                                                                                                                                                                 | Are there public transport stations within a 100m radius? *                    |
|                                                                                                                                                                 | Do you hear water sounds inside the park?                                      |
|                                                                                                                                                                 | Is there excessive noise around the park? *                                    |
|                                                                                                                                                                 | Is heavy traffic around the park? *                                            |
|                                                                                                                                                                 | Do you observe animal excrement in the park? *                                 |
|                                                                                                                                                                 | According to today's experience, is the smell of the park pleasant?            |
|                                                                                                                                                                 | Is there garbage in the park, other than around and/o inside the trash cans? * |
| <b>Factor 9<br/>Streets</b><br>( $\alpha=0.63$ )                                                                                                                | Are the trees the main source of shade in the park?                            |
|                                                                                                                                                                 | Do you hear traffic sounds inside the park? *                                  |
|                                                                                                                                                                 | Are most of the streets around the park primary? *                             |
|                                                                                                                                                                 | Are there any streets with pedestrian traffic lights around the park?          |
|                                                                                                                                                                 | Are there streets with traffic lights around the park?                         |
|                                                                                                                                                                 | Are there streets with safe crossings around the park?                         |
|                                                                                                                                                                 | Are most of the streets around the park secondary?                             |
|                                                                                                                                                                 | Are most of the streets around the park tertiary?                              |
|                                                                                                                                                                 | Are there streets with zebra crossings around the park?                        |
|                                                                                                                                                                 | Are there pedestrian streets around the park?                                  |
| <i>The items from <b>Factor 10, 11, 12 &amp; 13</b> were allocated to other factors in which they theoretically fit better as suggested by an expert group.</i> |                                                                                |

\* Reverse-coded items

**Table S3. Model III**

| <b>Factor</b>                                                           | <b>Items</b>                                                                                    |
|-------------------------------------------------------------------------|-------------------------------------------------------------------------------------------------|
| <b>Factor 1<br/>Food environment and wellbeing</b><br>( $\alpha=0.10$ ) | Is there food and beverage advertising inside the park? *                                       |
|                                                                         | Are there advertisements promoting cakes, cookies, or cake dough inside the park? *             |
|                                                                         | Is the land use around the park mainly commercial? *                                            |
|                                                                         | Is the condition of the landscape adequate?                                                     |
|                                                                         | Is the land use around the park mainly institutional?                                           |
|                                                                         | Are there food and beverage stalls around the park? *                                           |
|                                                                         | Write down the number of stalls around the park. *                                              |
| <b>Factor 2A<br/>Maintenance</b><br>( $\alpha=0.78$ )                   | Do you observe animal excrement in the park? *                                                  |
|                                                                         | Is the condition of the road/route/major trail good?                                            |
|                                                                         | Are the eating areas in good condition?                                                         |
|                                                                         | Do you see graffiti around the park? *                                                          |
|                                                                         | How much hazardous waste is visible in the park? (e.g., alcohol containers, preservatives...) * |
|                                                                         | Is the outdoor gymnasium in good condition?                                                     |
|                                                                         | Is the condition of the sidewalks bad? *                                                        |
|                                                                         | Is there garbage around the park? *                                                             |
|                                                                         | Are there empty or unpleasant buildings around the park? *                                      |
|                                                                         | Are there properties around the park in poor condition?                                         |
|                                                                         | Does the opening or operation of the park depend on a janitor or manager?                       |
|                                                                         | Is the playground area in good condition?                                                       |
|                                                                         | Are the green areas in good condition?                                                          |
|                                                                         | Is the condition of the sidewalks good?                                                         |
|                                                                         | Is the condition of the sidewalks regular?                                                      |
|                                                                         | Are the seating areas in good condition?                                                        |
|                                                                         | Is the state of the places to sit good?                                                         |
|                                                                         | Is there garbage in the park, other than around and/o inside the trash cans? *                  |
|                                                                         | Are the walking paths in good condition?                                                        |
|                                                                         | In general, is the park well maintained?                                                        |
| <b>Factor 2B<br/>Amenities</b><br>( $\alpha=0.72$ )                     | Does the park have parking facilities for bikes?                                                |
|                                                                         | Is there a bike route that leads to the park?                                                   |
|                                                                         | Is there electric lightning inside the park?                                                    |
|                                                                         | Is there a shoulder massage machine in the outdoor gym?                                         |
|                                                                         | What other areas for activities did you observe?                                                |
|                                                                         | Is there a fronton court inside the park?                                                       |
|                                                                         | Are all areas of the park open to the public?                                                   |
|                                                                         | Is there a football/soccer court inside the park?                                               |
|                                                                         | Is there a stationary bike in the outdoor gym?                                                  |
|                                                                         | Are there other areas of activities not mentioned above?                                        |
|                                                                         | Are there botanical gardens inside the park?                                                    |

|                                                                                             |                                                                                   |
|---------------------------------------------------------------------------------------------|-----------------------------------------------------------------------------------|
|                                                                                             | Does the park have a parking lot for cars?                                        |
|                                                                                             | Does the park have shelters?                                                      |
|                                                                                             | Is there a 5-a-side football/soccer court inside the park?                        |
|                                                                                             | Are there abdominal boards in the outdoor gym?                                    |
|                                                                                             | Is the park fenced or gated?                                                      |
|                                                                                             | Does the park have bathrooms?                                                     |
|                                                                                             | Is the outdoor gym being used?                                                    |
|                                                                                             | Is there a rowing machine in the outdoor gym?                                     |
|                                                                                             | Is there a ski walker in the outdoor gym?                                         |
|                                                                                             | Is there a colt in the outdoor gym?                                               |
|                                                                                             | Is there an elliptical trainer in the outdoor gym?                                |
|                                                                                             | Is there a leg press machine in the outdoor gym?                                  |
|                                                                                             | Does the outdoor gym have hoops?                                                  |
|                                                                                             | Is there a chest press machine in the outdoor gym?                                |
|                                                                                             | Does the outdoor gym have a multifunctional machine?                              |
|                                                                                             | Does the outdoor gym have hoops and a waistband?                                  |
|                                                                                             | Are there bars in the outdoor gym?                                                |
|                                                                                             | Is there a floating treadmill in the outdoor gym?                                 |
|                                                                                             | Is there a 7 football/soccer field in the park?                                   |
|                                                                                             | Are there courts that combine soccer and basketball?                              |
|                                                                                             | Is there a basketball court inside the park?                                      |
|                                                                                             | Does the outdoor gym have a surfboard?                                            |
|                                                                                             | Is there any other apparatus not mentioned above inside the outdoor gym?          |
|                                                                                             | Does the outdoor gym have a back massage machine?                                 |
|                                                                                             | Is the solar panel lighting inside the park?                                      |
|                                                                                             | Is the waist twist inside the outdoor gym?                                        |
|                                                                                             | Does the park have lighting?                                                      |
|                                                                                             | Does the park have drinking fountains?                                            |
|                                                                                             | Are there any creeks, lakes, or ponds inside the park?                            |
|                                                                                             | Is there a jogging path inside the park?                                          |
|                                                                                             | Is there a bike path inside the park?                                             |
|                                                                                             | Is there a skatepark area inside the park?                                        |
|                                                                                             | Does the park have parking facilities for motorbikes?                             |
| <b>Factor 3<br/>Readability<br/>(signs and<br/>announcements<br/>)</b><br>( $\alpha=0.58$ ) | Are there signs restriction bicycle parking area inside the park?                 |
|                                                                                             | Does the park have historical, educational, or artistic features?                 |
|                                                                                             | Is there a map of the park?                                                       |
|                                                                                             | Is there any sign of the appropriation of the park?                               |
|                                                                                             | Are there signs indicating other signage not mentioned above?                     |
|                                                                                             | Are there signs indicating where to dispose pet excrement?                        |
|                                                                                             | Are there posters promoting events inside the park?                               |
|                                                                                             | Are there garbage containers for recyclable products?                             |
|                                                                                             | Are there signs indicating the park's schedule of operation?                      |
|                                                                                             | Are there no parking signs around the park?                                       |
|                                                                                             | Are there signs indicating whether dogs must be on a leash or in a specific area? |
|                                                                                             | Is there any reference or sign indicating the name of the park?                   |



|                                                                                                                                               |                                                                                    |
|-----------------------------------------------------------------------------------------------------------------------------------------------|------------------------------------------------------------------------------------|
|                                                                                                                                               | Are there any announcements indicating the road, route, track of higher hierarchy? |
|                                                                                                                                               | Are there signs indicating whether the park has equipment for rental?              |
|                                                                                                                                               | Are there any indicators of who oversees the park?                                 |
| <i>The items from <b>Factor 4</b> were allocated to other factors in which they theoretically fit better as suggested by an expert group.</i> |                                                                                    |
| <b>Factor 5<br/>Safety</b><br>( $\alpha=0.48$ )                                                                                               | Is there medical service inside the park?                                          |
|                                                                                                                                               | Is there poor street lighting in the area around the park?                         |
|                                                                                                                                               | Do you observe uniformed park workers?                                             |
|                                                                                                                                               | Are there security cameras inside the park?                                        |
|                                                                                                                                               | Do you see panic buttons in the park?                                              |
|                                                                                                                                               | Is there vandalism inside the park?                                                |
|                                                                                                                                               | Is there a police presence inside the park?                                        |
|                                                                                                                                               | Are there guardhouses in the park?                                                 |
|                                                                                                                                               | Are there police stations inside the park?                                         |
|                                                                                                                                               | Is there any evidence of threatening people or behaviour?                          |
|                                                                                                                                               | Have there been any security incidents so far these years?                         |
| <b>Factor 6<br/>Accessibility</b><br>( $\alpha=0.42$ )                                                                                        | Are there public transport stations within a 100m radius? *                        |
|                                                                                                                                               | Does the park have a street inside?                                                |
|                                                                                                                                               | Are there public transportation stops in sight near the park? *                    |
|                                                                                                                                               | Are there streets with sidewalks around the park?                                  |
|                                                                                                                                               | Is there a shared trail around the park?                                           |
|                                                                                                                                               | Does the park have handrails?                                                      |
|                                                                                                                                               | Is the condition of these sidewalks regular? *                                     |
|                                                                                                                                               | Are people smoking inside the park? *                                              |
|                                                                                                                                               | Does the park have ramps to guarantee access to the park?                          |
| <b>Factor 8<br/>Perceived environment</b><br>( $\alpha=0.64$ )                                                                                | Do you hear bird sound inside the park?                                            |
|                                                                                                                                               | In total, how much of the park could be shaded?                                    |
|                                                                                                                                               | In general, what is the percentage of wooded areas in the park?                    |
|                                                                                                                                               | Do you hear music sounds inside the park?                                          |
|                                                                                                                                               | Do you hear voices sounds inside the park?                                         |
|                                                                                                                                               | Do you hear other sounds not mentioned above?                                      |
|                                                                                                                                               | Based on what you observed today, is the parks attractive to you?                  |
|                                                                                                                                               | Do you hear water sounds inside the park?                                          |
|                                                                                                                                               | Is there excessive noise around the park? *                                        |
|                                                                                                                                               | Is heavy traffic around the park? *                                                |
|                                                                                                                                               | According to today's experience, is the smell of the park pleasant?                |
|                                                                                                                                               | Are the trees the main source of shade in the park?                                |
|                                                                                                                                               | Do you hear traffic sounds inside the park? *                                      |
| <b>Factor 9<br/>Urban environment</b><br>( $\alpha=0.55$ )                                                                                    | Is the main land use inside the park natural?                                      |
|                                                                                                                                               | Are most of the streets around the park primary? *                                 |
|                                                                                                                                               | Are there any streets with pedestrian traffic lights around the park?              |
|                                                                                                                                               | Are there streets with traffic lights around the park?                             |
|                                                                                                                                               | Are there streets with safe crossings around the park?                             |
|                                                                                                                                               | Are most of the streets around the park secondary?                                 |
|                                                                                                                                               | Are most of the streets around the park tertiary?                                  |
|                                                                                                                                               | Are there streets with zebra crossings around the park?                            |

|  |                                               |
|--|-----------------------------------------------|
|  | Are there pedestrian streets around the park? |
|--|-----------------------------------------------|

\* Reverse-coded items
