# Supplementary material for: Development and Validation of the Mexican Public Open Spaces Tool (MexPOS)
Source: MDPI journal article supplement (doi:10.3390/ijerph19138198), 2022-07-05
Supplement: s1 [file s1]

| Starting models (items)                                                                                | MODEL I                                |                                                 | MODEL II                              |                                 | MODEL III                                    |                                                                                                             | MODEL IV (survey)                              |
|--------------------------------------------------------------------------------------------------------|----------------------------------------|----------------------------------------------------------------------------------------------------------------------------------|---------------------------------------|------------------------------------------------------------------------------------------------------------------|----------------------------------------------|------------------------------------------------------------------------------------------------------------------------------------------------------------------------------------------------|------------------------------------------------|
| Original questionnaire (181 items)<br>Based on:<br>BRAT-DO, EAPRS, and a group of experts (Appendix 1) | Advertisement and land uses<br>F1 (14) | EXPERTS<br>TECHNIQUE<br>Date:<br>(2021/03/03)<br><br>Main conclusions:<br>(F7, F10, F11, F12 and F13 allocated to other factors) | Advertisement and land uses<br>F1 (7) | EXPERTS<br>TECHNIQUE<br>Date:<br>(2021/04/05)<br><br>Main conclusions:<br>(F4 and F7 allocated to other factors) | Food environment and wellbeing<br>F1 (7)     | EXPERTS<br>TECHNIQUE<br>Date:<br>(2021/05/10)<br><br>Main conclusions:<br>General park information was included. This information came from the first version of the questionnaire (n=3 items) | General park information<br>F1 (3)             |
|                                                                                                        | Amenities and maintenance<br>F2 (27)   |                                                                                                                                  | Amenities and maintenance<br>F2 (41)  |                                                                                                                  | Maintenance<br>F2A (20)                      |                                                                                                                                                                                                | Food Environment and Health wellness<br>F2 (6) |
|                                                                                                        | Signs and announcements<br>F3 (10)     |                                                                                                                                  | Signs and announcements<br>F3 (13)    |                                                                                                                  | Amenities<br>F2B (44)                        |                                                                                                                                                                                                | Maintenance<br>F3 (21)                         |
|                                                                                                        | Outdoor<br>F4 (15)                     |                                                                                                                                  | Outdoor and activities<br>F4 (16)     |                                                                                                                  | Readability (signs announcements)<br>F3 (15) |                                                                                                                                                                                                | Amenities<br>F4 (44)                           |
|                                                                                                        | Safety and cycling<br>F5 (8)           |                                                                                                                                  | Safety and cycling<br>F5 (22)         |                                                                                                                  | Safety<br>F5 (11)                            |                                                                                                                                                                                                | Signaling<br>F5 (15)                           |
|                                                                                                        | Pedestrians<br>F6 (11)                 |                                                                                                                                  | Pedestrians<br>F6 (10)                |                                                                                                                  | Accessibility<br>F6 (9)                      |                                                                                                                                                                                                | Safety<br>F6 (11)                              |
|                                                                                                        | Sport area maintenance<br>F7 (10)      |                                                                                                                                  | Sensory elements<br>F8 (9)            |                                                                                                                  | Perceived environment<br>F8 (13)             |                                                                                                                                                                                                | Perceived environment<br>F7 (14)               |
|                                                                                                        | Sensory elements<br>F8 (9)             |                                                                                                                                  | Streets<br>F9 (10)                    |                                                                                                                  | Urban environment<br>F9 (9)                  |                                                                                                                                                                                                | Urban surroundings<br>F8 (17)                  |
|                                                                                                        | External context<br>F9 (4)             |                                                                                                                                  |                                       |                                                                                                                  |                                              |                                                                                                                                                                                                |                                                |
|                                                                                                        | Streets<br>F10 (4)                     |                                                                                                                                  |                                       |                                                                                                                  |                                              |                                                                                                                                                                                                |                                                |
|                                                                                                        | Outdoor sport facilities<br>F11 (6)    |                                                                                                                                  |                                       |                                                                                                                  |                                              |                                                                                                                                                                                                |                                                |
|                                                                                                        | Inside park characteristics<br>F12 (5) |                                                                                                                                  |                                       |                                                                                                                  |                                              |                                                                                                                                                                                                |                                                |
|                                                                                                        | Other park characteristics<br>F13 (5)  |                                                                                                                                  |                                       |                                                                                                                  |                                              |                                                                                                                                                                                                |                                                |
| <b>Total items</b>                                                                                     | 128                                    |                                                                                                                                  | 128                                   |                                                                                                                  | 128                                          |                                                                                                                                                                                                | 131                                            |
