# Supplementary material for: Development and Validation of the Mexican Public Open Spaces Tool (MexPOS)
Source: Int J Environ Res Public Health. 2022 Jul 5;19(13):8198. doi: 10.3390/ijerph19138198 (PMC9266626; doi:10.3390/ijerph19138198)
Supplement: Supplementary file 1 [file ijerph-19-08198-s001.zip]

Archive with 4 entries (4 files):
- File S1. Final questionnaire-Spanish.pdf
- File S2. Final questionnaire-English.pdf
- File S3.pdf
- Table S1-3.pdf
